# Supplementary material
Source: PubMed Central journal article supplement (PMC7025500)
Supplement: NIHMS1551544-supplement-2.pdf [file NIHMS1551544-supplement-2.pdf]

## Striatal Projection Neurons Require Huntingtin for Synaptic Connectivity and Survival

### Graphical Abstract

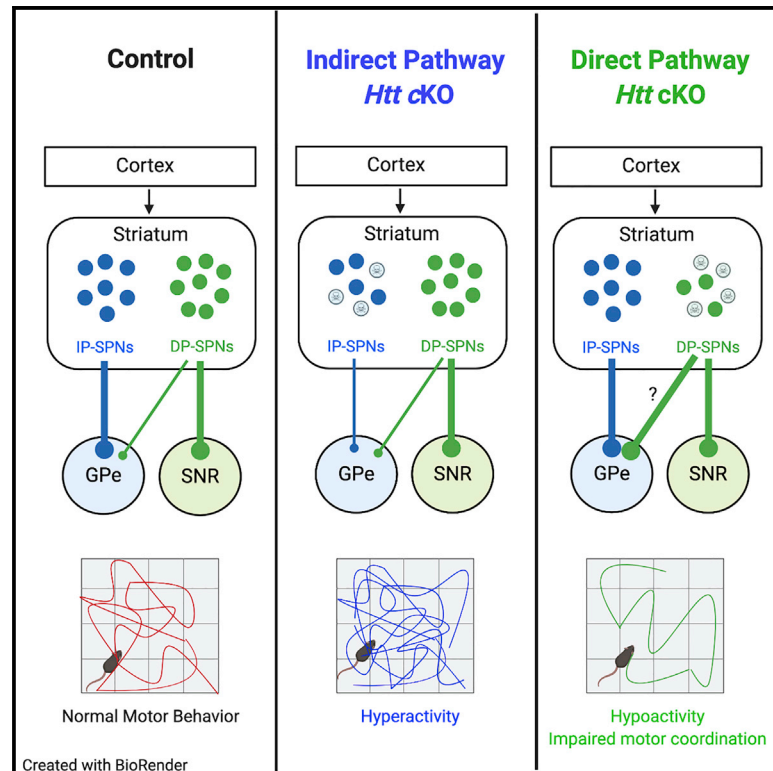

### Authors

Caley J. Burrus, Spencer U. McKinstry, Namsoo Kim, ..., Scott Zeitlin, Henry H. Yin, Cagla Eroglu

### Correspondence

cagla.eroglu@duke.edu

### In Brief

Burrus et al. show that striatal projection neurons require Huntingtin, the gene mutated in Huntington's disease, for normal synaptic connectivity, regulated gene expression, and neuronal survival with aging. Loss of Huntingtin from striatal neurons recapitulates several features of Huntington's disease pathology, an important consideration for therapies non-specifically targeting Huntingtin expression.

### Highlights

- Loss of Htt in striatal neurons recapitulates key features of Huntington's disease
- Striatal neurons require Htt for survival during aging
- Deletion of Htt from striatal neurons disrupts synaptic connectivity

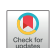

# Striatal Projection Neurons Require Huntingtin for Synaptic Connectivity and Survival

Caley J. Burrus,<sup>1,2</sup> Spencer U. McKinstry,<sup>2</sup> Namsoo Kim,<sup>3</sup> M. Ilcim Ozlu,<sup>2</sup> Aditya V. Santoki,<sup>2</sup> Francia Y. Fang,<sup>2</sup> Annie Ma,<sup>2</sup> Yonca B. Karadeniz,<sup>2</sup> Atesh K. Worthington,<sup>2</sup> Ioannis Dragatsis,<sup>4</sup> Scott Zeitlin,<sup>5</sup> Henry H. Yin,<sup>1,3,6</sup> and Cagla Eroglu<sup>1,2,6,7,8,\*</sup>

<sup>1</sup>Department of Neurobiology, Duke University Medical Center, Durham, NC 27710, USA

<sup>2</sup>Department of Cell Biology, Duke University Medical Center, Durham, NC 27710, USA

<sup>3</sup>Department of Psychology and Neuroscience, Trinity College of Arts and Sciences, Duke University, Durham, NC 27710, USA

<sup>4</sup>Department of Physiology, The University of Tennessee, Health Science Center, Memphis, TN 38163, USA

<sup>5</sup>Department of Neuroscience, University of Virginia, School of Medicine, Charlottesville, VA 22908, USA

<sup>6</sup>Duke Institute for Brain Sciences, Durham, NC 27710, USA

<sup>7</sup>Regeneration Next Initiative, Duke University, Durham, NC 27710, USA

<sup>8</sup>Lead Contact

\*Correspondence: [cagla.eroglu@duke.edu](mailto:cagla.eroglu@duke.edu)

<https://doi.org/10.1016/j.celrep.2019.12.069>

## SUMMARY

Huntington's disease (HD) is caused by an autosomal dominant polyglutamine expansion mutation of Huntingtin (*HTT*). HD patients suffer from progressive motor, cognitive, and psychiatric impairments, along with significant degeneration of the striatal projection neurons (SPNs) of the striatum. HD is widely accepted to be caused by a toxic gain-of-function of mutant HTT. However, whether loss of HTT function, because of dominant-negative effects of the mutant protein, plays a role in HD and whether HTT is required for SPN health and function are not known. Here, we delete *Htt* from specific subpopulations of SPNs using the Cre-Lox system and find that SPNs require HTT for motor regulation, synaptic development, cell health, and survival during aging. Our results suggest that loss of HTT function in SPNs could play a critical role in HD pathogenesis.

## INTRODUCTION

Huntington's disease (HD) is a fatal, inherited neurodegenerative disorder with motor, psychiatric, and cognitive symptoms that typically emerge in midlife. The hallmark of HD is the progressive death of striatal projection neurons (SPNs) (Vonsattel et al., 1985). SPNs, which comprise >90% of the cells in the striatum, are GABAergic output neurons that are divided into two groups: the direct pathway (DP) and indirect pathway (IP) SPNs (DP-SPNs and IP-SPNs, respectively). Both SPN subtypes receive extensive glutamatergic inputs from the cortex and thalamus, and dopaminergic inputs from the ventral tegmental area and substantia nigra pars compacta. However, they differ with regard to their principal synaptic targets and their dopamine receptor expression. IP-SPNs project exclusively to the globus pallidus (GPe) and express the dopamine receptor D2 (Smith et al., 1998). DP-SPNs express the dopamine recep-

tor D1 and project primarily to the substantia nigra pars reticulata (SNR) and entopeduncular nucleus, but also send collaterals to the GPe to a lesser extent (Cazorla et al., 2014). When stimulated, DP-SPNs promote movement and IP-SPNs inhibit movement (Alexander and Crutcher, 1990; Durieux et al., 2009; Kravitz et al., 2010). The correct balance in the activities of these SPN pathways is essential for coordinated voluntary motor function, and dysfunction of these pathways is linked to many movement disorders, including HD (Albin et al., 1989; Kravitz et al., 2010).

HD is caused by an autosomal dominant CAG repeat expansion in the first exon of the Huntingtin (*HTT*) gene (ENSG00000197386), which results in enlargement of a polyglutamine stretch near the N terminus of the HTT protein (Macdonald et al., 1993). HTT is proposed to act as a signaling scaffold for cellular processes, including autophagy, vesicle transport, and mitotic spindle orientation (Rui et al., 2015; Caviston et al., 2007; Gauthier et al., 2004; Godin et al., 2010). Presence of more than 39 CAG repeats causes HD, and the number of CAG repeats and age of disease onset are inversely correlated (Duyao et al., 1993). Despite the known genetic cause, the mechanisms of SPN degeneration in HD remain unclear.

Many mouse models expressing mutant HTT (mHTT) display features similar to HD, such as dysregulated motor function, changes in SPN gene expression, and progressive neurodegeneration (McKinstry et al., 2014; Luthi-Carter et al., 2000; Hodgson et al., 1999). Interestingly, patients and mouse models show abnormal cortical and striatal synaptic connectivity preceding motor symptom onset, mHTT aggregation, and SPN loss (Deng et al., 2013; Milnerwood and Raymond, 2007; Unschuld et al., 2012). However, the mechanisms driving synapse and circuit dysfunction in HD are not yet known.

Given the autosomal dominant nature of the HD-causing mutation, it has long been thought that SPN death in HD is mainly caused by toxic "gain-of-function" of mHTT. Although evidence for neuronal toxicity of mHTT is extensive, there are also strong indications for dominant-negative "loss-of-function" contributions of mHTT to HD pathology (Arrasate et al., 2004; Cattaneo et al., 2005). For instance, wild-type HTT is important for cell

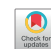

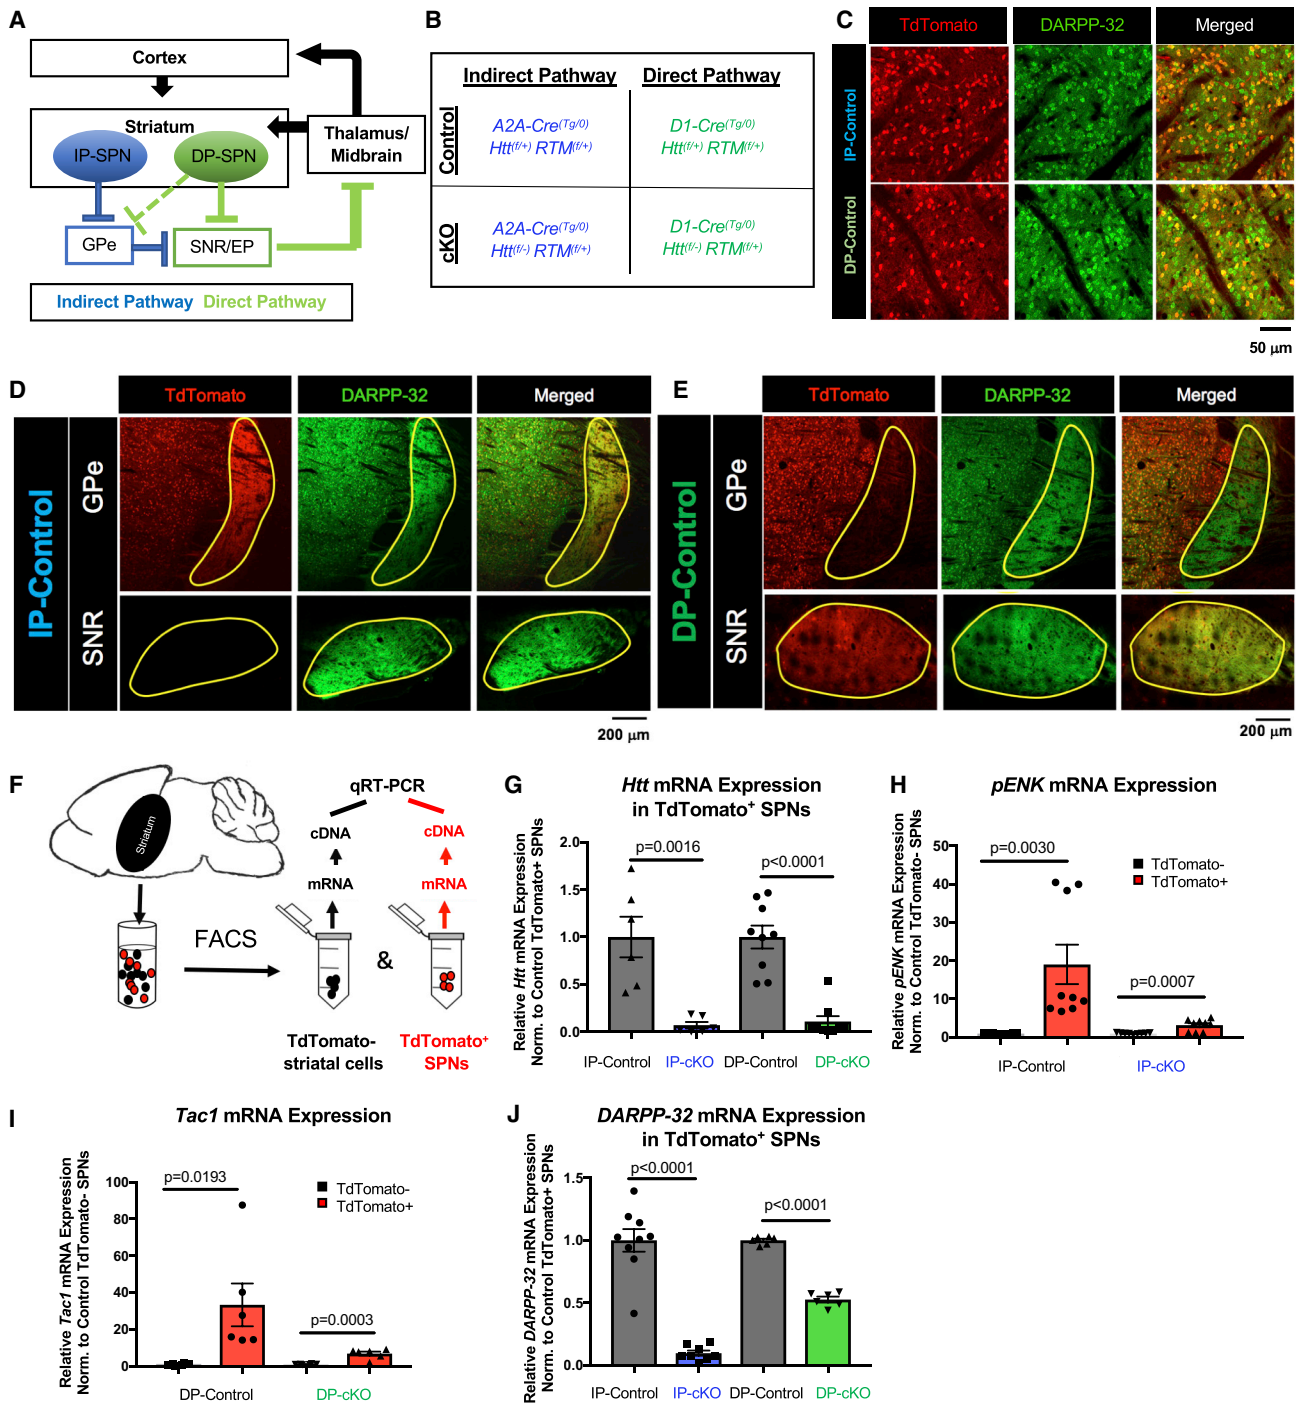

**Figure 1. Conditional Deletion of *Htt* in Indirect and Direct Pathway SPNs**

(A) Schematic of the basal ganglia circuit controlling motor function. Arrows indicate excitatory synaptic connections; blunt ends indicate inhibitory synaptic connections. DP-SPN, direct pathway striatal projection neuron; EP, entopeduncular nucleus; GPe, globus pallidus externus; IP-SPN, indirect pathway striatal projection neuron; SNR, substantia nigra pars reticulata.

(B) Breeding scheme for SPN-specific *Htt* cKO mice. *Htt* is deleted in IP-SPNs using the *A2A-Cre* transgene and in DP-SPNs using the *D1-Cre* transgene in combination with the floxed *Htt* allele. All mice have a *Rosa-(STOP)<sup>fl/+</sup>-TdTomato (RTM)* allele, which drives the expression of TdTomato in Cre-expressing cells.

(C) Cre-reporter TdTomato is expressed in SPN cell bodies. *A2A-Cre* (upper) and *D1-Cre* (lower) result in TdTomato expression in ~50% of DARPP-32<sup>+</sup> SPNs.

(D) *A2A-Cre* is expressed by SPNs that extend to the GPe, but not to the SNR.

(E) *D1-Cre* is expressed by SPNs that extend axons to SNR and to a lesser extent to the GPe.

(legend continued on next page)

health and viability, because deleting *Htt* in the mouse central nervous system leads to aberrant synaptic connectivity, cellular stress, neuroinflammation, and neuronal death (McKinstry et al., 2014; Dragatsis et al., 2000, 2018; Mehler et al., 2019). On the other hand, wild-type HTT is neuroprotective and can shield neurons against mHTT toxicity (Leavitt et al., 2006). However, whether HTT is specifically required for SPN development, connectivity, and survival has not yet been determined. To address this critical knowledge gap, we deleted *Htt* from murine SPNs and found that HTT loss in SPNs leads to motor dysfunction with concurrent changes in SPN synaptic connectivity and function. Loss of HTT in SPNs also altered gene expression and nuclear morphology, preceding aging-dependent SPN loss and reactive gliosis. Taken together, these results demonstrate that HTT loss in SPNs disrupts the development, connectivity, and survival of these neurons during aging, recapitulating several key features of HD. Therefore, loss-of-function mechanisms may play important roles in the death and dysfunction of SPNs in HD.

## RESULTS

### Conditional Deletion of *Htt* in IP-SPNs and DP-SPNs

To investigate the role of HTT in SPN connectivity and health, we used the Cre-Lox system to conditionally delete *Htt* from IP-SPN and DP-SPN subpopulations in mice (Figures 1A and 1B). IP-SPNs were targeted by using Adora2A-Cre (*A2A-Cre*) transgenic mice, and DP-SPNs by using *D1-Cre* transgenic mice (Gerfen et al., 2013). To delete *Htt* from SPNs, we crossed *Cre*<sup>(Tg/Tg)</sup> *Htt*<sup>(+/-)</sup> and *Htt*<sup>(ff)</sup> mice (Dragatsis et al., 2000), producing littermate offspring that were *Cre*<sup>(Tg/0)</sup> *Htt*<sup>(ff/+)</sup> (control) or *Cre*<sup>(Tg/0)</sup> *Htt*<sup>(ff/-)</sup> (conditional knockout [cKO]) (Figure 1B). A Cre-reporter *Rosa*-(*STOP*)<sup>fl/+</sup>-*TdTomato* transgene (*RTM*) was also present in all offspring to visualize Cre-expressing cells. cKO mice had both *Htt* alleles deleted in SPNs but were heterozygous for *Htt* in all other cell types. Control mice were heterozygous for *Htt* in SPNs but had both *Htt* alleles in all other cells. The *Htt*<sup>(ff/-)</sup> allele is needed to effectively delete both copies of *Htt* by Cre recombination and reduce mRNA levels, because *Htt* expression is up-regulated to wild-type levels in *Htt*<sup>(+/-)</sup> neurons (McKinstry et al., 2014). Importantly, *Htt* heterozygosity in mice or humans does not affect neuronal health, survival, or behavior (Ambrose et al., 1994; Duyao et al., 1995).

In line with previous reports on *A2A-Cre* or *D1-Cre* mice (Zhang et al., 2006; Bateup et al., 2010; Gerfen et al., 2013), Cre (TdTomato) expression was confined to ~50% of DARPP-32-expressing (DARPP-32<sup>+</sup>) SPN cell bodies (Figure 1C). *A2A-Cre*-expressing SPNs exclusively extended their axonal projections to the GPe, and no TdTomato signal was observed in the SNR (Figure 1D), whereas *D1-Cre*-driven TdTomato expression was primarily in axons extending to the SNR (Figure 1E, bottom). Some axonal TdTomato signal was observed in the GPe of *D1-Cre* mice, because DP-SPNs send axon collaterals through the GPe (Figure 1E, top; Cazorla et al., 2014). *A2A-Cre* expression was restricted to IP-SPNs; however, *D1-Cre*-expressing cells were present in the cortices of *D1-Cre* mice, because subsets of cortical neurons express the dopamine receptor D1 (Vijayraghavan et al., 2017). We found that ~15% of layer 2/3, ~15% of layer 4, and ~40% of layer 5/6 NeuN<sup>+</sup> neurons express *D1-Cre* in the M1 motor cortex, which harbors pyramidal neurons that project to dorsal striatum that is affected in HD (Figures S1A–S1C). However, there were no differences in the proportion of *D1-Cre*<sup>+</sup> cortical neurons between genotypes (Figures S1B and S1C).

We used western blot to analyze striatal HTT protein expression of 2-month-old cKO mice and their controls to determine whether HTT expression was sufficiently reduced by *A2A-Cre* and *D1-Cre*. As expected, there was significantly less HTT protein expressed in cKO striata compared with controls (Figures S1D–S1F). Consistent with the cortical *D1-Cre* expression, HTT protein expression was also reduced in DP-cKO cortical lysates compared with DP-controls (Figures S1G and S1H).

We next used fluorescence-activated cell sorting (FACS) to separate TdTomato<sup>+</sup> SPNs (DP-SPNs in DP-cKO, IP-SPNs in IP-cKO) from the remaining TdTomato<sup>-</sup> cells from the striata of 2-month-old mice for quantitative PCR (qPCR) analysis (Figure 1F). *Htt* expression was dramatically reduced in cKO SPNs compared with corresponding controls (Figure 1G). To verify that the cells we sorted were bona fide SPNs, we analyzed the expression of SPN marker genes *pENK* and *Tac1*, which are enriched in IP-SPNs or DP-SPNs, respectively (Lobo et al., 2006). As expected, TdTomato<sup>+</sup> IP-SPNs were enriched for *pENK* compared with TdTomato<sup>-</sup> cells, and TdTomato<sup>+</sup> DP-SPNs were enriched for *Tac1* in both controls and cKOs (Figures 1H and 1I). However, we observed a substantial reduction in the degree of enrichment of *pENK* in cKO IP-SPNs and of *Tac1* in cKO

(F) Schematic of fluorescence-activated cell sorting (FACS) approach. The striatum is dissected from 2-month-old mice, and FACS is used to separate TdTomato<sup>+</sup> SPNs from TdTomato<sup>-</sup> cells. qRT-PCR is used to analyze gene expression after mRNA isolation/cDNA synthesis.

(G) *Htt* mRNA expression, as measured by qPCR, is reduced in IP-cKO SPNs compared with IP-control SPNs (n = 2 experiments, samples run in triplicate, unpaired two-way t test, t = 4.296, degrees of freedom [df] = 10, p = 0.0016). *Htt* mRNA expression is also reduced in DP-cKO SPNs compared with DP-control SPNs (n = 3 experiments, samples run in triplicate, unpaired two-way t test, t = 6.663, df = 16, p < 0.0001; graph displays mean ± SEM).

(H) Quantification of *pENK* mRNA expression in 2-month-old IP-cKOs and IP-controls (n = 3 experiments, samples run in triplicate; IP-control TdTomato versus IP-control TdTomato<sup>+</sup> unpaired two-way t test, t = 3.497, df = 16, p = 0.0030; IP-cKO TdTomato<sup>-</sup> versus IP-cKO TdTomato<sup>+</sup> unpaired two-way t test, t = 4.202, df = 16, p = 0.0007; graph displays mean ± SEM).

(I) Quantification of *Tac1* mRNA expression in 2-month-old DP-cKOs and DP-controls (n = 2–3 experiments, samples run in triplicate; DP-control TdTomato<sup>-</sup> versus DP-control TdTomato<sup>+</sup> unpaired two-way t test, t = 2.785, df = 10, p = 0.0193; DP-cKO TdTomato<sup>-</sup> versus DP-cKO TdTomato<sup>+</sup> unpaired two-way t test, t = 5.433, df = 16, p = 0.0003; graph displays mean ± SEM).

(J) Quantification of *DARPP-32* mRNA expression in 2-month-old IP-cKO IP-SPNs versus IP-control, and DP-cKO DP-SPNs versus DP-control (n = 2–3 experiments, samples run in triplicate; IP-control TdTomato<sup>+</sup> versus IP-cKO TdTomato<sup>+</sup> unpaired two-way t test, t = 9.239, df = 15, p < 0.0001; DP-control TdTomato<sup>+</sup> versus DP-cKO TdTomato<sup>+</sup> unpaired two-way t test, t = 17.73, df = 10, p < 0.0001; graph displays mean ± SEM).

See Figures S1 and S2.

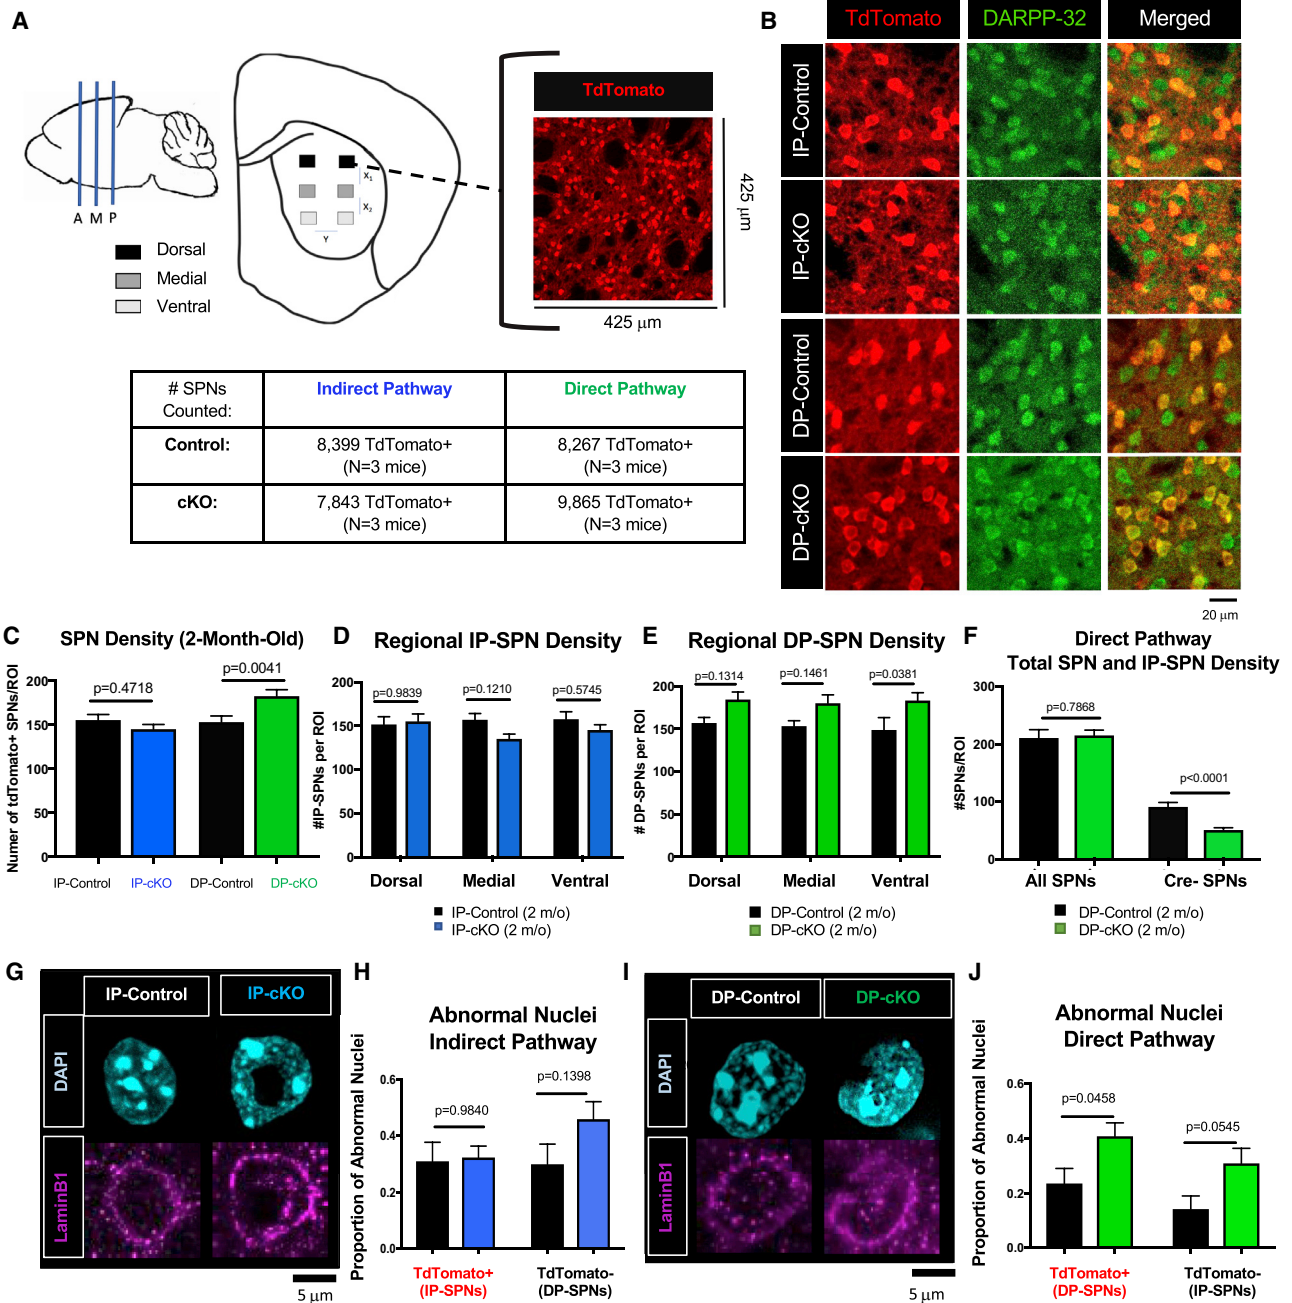

**Figure 2. Htt Is Not Required for Initial SPN Survival**

(A) Schematic of unbiased SPN counting strategy. Three coronal slices spanning anterior, medial, and posterior striatum were collected and stained for TdTomato and DARPP-32. Two images were acquired from the dorsal, medial, and ventral striatum, with displacement ( $x_1$ ,  $x_2$ ,  $y$ ) between images kept constant across slices. Number of cells counted/mice analyzed is displayed in the table.

(B) Representative images of 2-month-old IP-control, IP-cKO, DP-control, and DP-cKO striatum stained for TdTomato (red, TdTomato/Cre<sup>+</sup> SPNs) and DARPP-32 (green, all SPNs).

(C) There is no difference in IP-SPN density in 2-month-old IP-cKO mice compared with IP-controls, whereas there are more DP-SPNs in DP-cKOs relative to DP-controls ( $n = 6$  images/mouse, 3 mice/genotype, one-way ANOVA with Sidak's multiple comparisons test  $F(3,104) = 6.081$ ,  $p$  values displayed on graph; graph displays mean  $\pm$  SEM).

(D) There is no effect of region on IP-SPN density in 2-month-old IP-cKOs versus IP-controls ( $n = 6$  images/animal, 3 animals/genotype, two-way ANOVA genotype by region interaction  $F(2,102) = 1.447$ ,  $p = 0.2401$ , Sidak's multiple comparisons test for within-region comparisons,  $p$  values displayed above; graph displays mean  $\pm$  SEM).

(legend continued on next page)

DP-SPNs, compared with their controls (Figures 1H and 1I). pENK protein expression, measured by fluorescence intensity of immunostaining, was also reduced in IP-SPNs of IP-cKO mice and in the IP-SPNs of DP-cKO mice, suggesting both cell-autonomous and non-cell-autonomous effects of *Htt* deletion on the gene expression of IP-SPNs (Figures S2A–S2D). Intriguingly, *pENK* and *Tac1* expression are both diminished in HD patients and model mice (Luthi-Carter et al., 2000; Hodges, et al., 2006).

DARPP-32, a key downstream integrator of dopaminergic signaling cascades, is a pan-SPN marker that is downregulated in HD (Bibb et al., 2000). *DARPP-32* mRNA expression was strikingly reduced in cKO SPNs of both genotypes compared with control SPNs (Figure 1J). DARPP-32 protein expression, measured as fluorescence intensity per cell, was also diminished (Figures S2E–S2H). IP-cKO caused a reduction in DARPP-32 protein expression both in IP-SPNs lacking HTT and their HTT-expressing DP-SPN neighbors, showing a non-cell-autonomous effect of IP-cKO on DARPP-32 expression (Figures S2E and S2F). However, DARPP-32 protein expression in DP-cKO mice was reduced only in DP-SPNs (Figures S2G and S2H).

CTIP, a nuclear protein involved in cell proliferation and transcriptional regulation, is another pan-SPN marker and is upregulated in HD mice (Langfelder et al., 2016). We found that CTIP protein expression was slightly increased in cKO IP-SPNs compared with controls (Figures S2I and S2J). We also found a trending increase in CTIP expression in neighboring DP-SPNs in IP-cKOs (Figures S2I and S2J). On the other hand, CTIP expression in DP-cKOs was reduced both in DP-SPNs and neighboring IP-SPNs relative to DP-controls (Figures S2K and S2L). Taken together, these results show that *Htt* deletion disrupts SPN-specific gene expression, reminiscent of gene expression changes seen in HD.

### Huntingtin Is Not Required for Initial SPN Survival

Wild-type HTT plays critical roles in cell health and viability. Global knockout of *Htt* in mice is embryonically lethal, and loss of HTT in progenitor cells leads to impairments in cell proliferation, migration, and survival (Godin et al., 2010; Elias et al., 2015; Tong et al., 2011; Mehler et al., 2019; Nasir et al., 1995). Furthermore, *Htt* cKO in mouse cortical neurons leads to synaptic dysfunction, cell stress and neuroinflammation, and neuronal

death (Dragatsis et al., 2000; McKinstry et al., 2014). However, whether wild-type *Htt* is required for SPN genesis or survival is unknown.

We counted TdTomato<sup>+</sup> SPNs in 2-month-old cKO mice and their respective controls. To do so, we immunostained three coronal brain sections per mouse spanning the anterior-to-posterior striatum (bregma 1.345 to –0.755 mm) for TdTomato and DARPP-32. Our imaging strategy allows us to analyze SPN density along the striatal dorsal-to-ventral axis. Using a confocal microscope with an automated stage, we acquired images from identical regions by maintaining a standardized displacement from the corpus callosum (dorsal-to-ventral axis, y-displacement) and the lateral ventricle (lateral-to-medial axis, x-displacement) (Figure 2A, top). All TdTomato<sup>+</sup> (Cre<sup>+</sup>) SPNs were counted, resulting in >7,500 Cre<sup>+</sup> cells counted per genotype (Figure 2A, bottom).

We found no difference in the density of IP-SPNs in 2-month-old IP-cKO mice compared with IP-controls, and there was no effect of region on IP-SPN density (Figures 2B and 2D). However, we observed more DP-SPNs in 2-month-old DP-cKO mice compared with DP-controls (Figures 2C and 2E). To determine whether the density of IP-SPNs in DP-cKO mice was also affected, we counted all DARPP-32<sup>+</sup> SPNs of DP-cKO and control mice. We found no difference in the total DARPP-32<sup>+</sup> SPN density, indicating that DP-cKOs had significantly fewer IP-SPNs (Cre<sup>-</sup>/DARPP-32<sup>+</sup> cells) relative to DP-controls (Figure 2F). This result suggests that HTT is required for controlling the genesis or differentiation of SPNs.

While counting cells, we observed irregularly shaped nuclei of cKO SPNs that had apparent holes and/or invaginations. Invaginated nuclei are seen in human HD patient and mouse model neurons (Roos and Bots, 1983; Kutscher and Shaham, 2017; Davies et al., 1997; Goldman et al., 2004). Abnormal nuclear structure has also been associated with developmentally programmed cell death (Abraham et al., 2007). Nuclear architecture is intimately related to transcriptional regulation, and abnormal nuclear structure may lead to dysregulated gene expression. In line with our findings of abnormal SPN gene expression, we asked whether *Htt* deletion in IP-SPNs or DP-SPNs leads to a greater frequency of SPN nuclear crenellation.

To identify abnormal nuclei, we stained control and cKO dorsal striatum for TdTomato to label Cre<sup>+</sup> SPNs and DAPI to visualize

(E) There is no effect of region on DP-SPN density in 2-month-old DP-cKOs compared with DP-controls ( $n = 6$  images/animal, 3 animals/genotype, two-way ANOVA genotype by region interaction  $F(2,102) = 0.09598$ ,  $p = 0.9086$ , Sidak's multiple comparisons test for within-region comparisons,  $p$  values displayed above; graph displays mean  $\pm$  SEM).

(F) There is no difference in the total density of SPNs (DARPP-32<sup>+</sup> cells) in DP-cKOs compared with controls ( $n = 2$ –3 mice/genotype, 6 images/mouse, unpaired two-way  $t$  test,  $t = 0.2724$ ,  $df = 37$ ,  $p = 0.7868$ ), but there is a significant reduction in the number of Cre<sup>-</sup>/DARPP-32<sup>+</sup> SPNs ( $n = 2$ –3 mice/genotype, 6 images/mouse, unpaired two-way  $t$  test,  $t = 5.073$ ,  $df = 37$ ,  $p < 0.001$ ; graph displays mean  $\pm$  SEM).

(G) Representative Airyscan images of SPN nuclei from the dorsal striatum of 2-month-old IP-controls and IP-cKOs stained for DAPI (cyan) and Lamin B1 (magenta).

(H) There is no difference in the proportion of abnormal nuclei of TdTomato<sup>+</sup> IP-SPNs or TdTomato<sup>-</sup> DP-SPNs in the dorsal striatum of 2-month-old IP-cKOs compared with IP-controls ( $n = 3$  mice/genotype, 3 images/mouse, one-way ANOVA  $F(3,44) = 1.572$ , Sidak's multiple comparisons test for within-region comparisons,  $p$  values displayed above; graph displays mean  $\pm$  SEM).

(I) Representative Airyscan images of SPN nuclei from the dorsal striatum of 2-month-old DP-controls and DP-cKOs stained for DAPI (cyan) and Lamin B1 (magenta).

(J) There is a greater proportion of abnormal TdTomato<sup>+</sup> DP-SPN nuclei and a trending increase in abnormal nuclei of TdTomato<sup>-</sup> IP-SPN nuclei in the dorsal striatum of 2-month-old DP-cKOs compared with DP-controls ( $n = 3$  mice/genotype, one-way ANOVA  $F(3,44) = 4.725$ , Sidak's multiple comparisons test for within-region comparisons,  $p$  values displayed above; graph displays mean  $\pm$  SEM).

nuclei (Figures 2G and 2I). Nuclei were hand-scored as either normal (nuclei with round, uniform morphology) or abnormal (nuclei with membrane invaginations, membrane crinkling, or “holes”) by experimenters blind to genotype. Normal and abnormal nuclei were observed in SPNs of all genotypes, including controls. We did not observe a difference in the proportion of abnormal nuclei in 2-month-old IP-cKO SPNs compared with controls (Figures 2G and 2H). However, we did find a robust increase in the proportion of abnormal DP-SPN nuclei in 2-month-old DP-cKO mice and a trending increase in crenellations in their IP-SPN neighbors (Figures 2I and 2J). In sum, loss of HTT does not cause SPN loss in early adulthood, but HTT plays a role in regulating the initial number of DP-SPNs formed. The abnormal nuclear structure we observed in DP-cKO SPNs may contribute to the dysregulated gene expression we also found in these cells (see Figures 1H–1J and S2).

### Loss of Huntingtin in SPNs Impairs Motor Function

Because SPNs are an integral part of the basal ganglia circuit controlling motor function, we asked whether loss of HTT in IP-SPNs or DP-SPNs affects mouse motor behavior using the open field test (OFT) (Pogorelov et al., 2005) to examine the gross motor activity of 2-month-old cKO mice and their age-matched controls. Compared with 2-month-old IP-controls, IP-cKO mice were hyperactive in the OFT. IP-cKOs traveled significantly longer distances throughout the 60-min testing window, leading to a greater cumulative distance traveled and more time spent moving (Figures 3A and 3B). The difference in distance traveled was significant only during the first 30 min of testing, but mice spent more time moving during both the first and last 30 min of testing (Figures S3A and S3B). IP-cKOs did not perform more stereotypic episodes, nor did they spend more time in the margins of the OFT, suggesting that their hyperactivity is not due to increased anxiety (Figures S3E and S3F).

Conversely, *Htt* deletion in DP-SPNs led to hypoactivity in the OFT. Two-month-old DP-cKOs traveled shorter distances and spent less total time moving compared with DP-controls (Figures 3C and 3D). There was also a trending reduction in the number of stereotypic episodes performed by DP-cKOs, mirroring their overall reduced activity level (Figure S3E). The hypoactivity of DP-cKO mice was much more pronounced during the last 30 min of the OFT. These results suggest that DP-cKOs are not as deficient in their ability to initiate adequate motor activity at baseline (Figures S3C and S3D), but instead they lack the capacity and/or motivation to sustain activity throughout the test. DP-cKO mice did spend slightly more time in the margins of the OFT compared with controls, which may be explained by their overall hypoactivity and increased time spent immobile (Figure S3F).

Next, we examined motor coordination in cKO and control mice using the accelerating rotarod task (ART) (Wang et al., 2016b). *Htt* deletion in IP-SPNs did not cause any detectable deficits in motor coordination or learning on the ART at 2 months old (Figure 3E). However, DP-cKOs performed significantly worse on the ART compared with DP-controls (Figure 3F). Also, DP-cKOs did not display significant improvement in latency to fall between trials 1 and 4, indicating that *Htt* deletion in DP-SPN may impair motor learning (Figure 3F, right). In sum, both SPN subtypes require HTT for the proper control of move-

ment. Deleting *Htt* in IP-SPNs results in hyperactive locomotion without any significant motor coordination impairment, whereas *Htt* loss in DP-SPNs leads to hypoactive locomotion along with impaired coordination. These findings suggest that HTT is required in SPNs for the proper function of the basal ganglia circuit controlling movement.

### IP-SPNs Require Huntingtin for Proper Synaptic Connectivity and Function

Given that *Htt* deletion in both SPN subtypes disrupted the motor behavior of 2-month-old mice, we asked whether loss of *Htt* in SPNs alters the synaptic connectivity of these neurons. To do so, we analyzed the number and function of inhibitory synapses in the GPe of 2-month-old IP-cKO mice using immunohistochemical and electrophysiological approaches (Figure 4A). To count GABAergic synapses in the GPe, we stained sagittal brain sections containing the GPe (lateral to midline, 1.725 to 2.40 mm) for vesicular GABA transporter (VGAT) and gephyrin, a pair of pre- and post-synaptic markers that are specific to inhibitory synapses (Figure 4B). We quantified the colocalization of VGAT and gephyrin as a measure of the number of GABAergic synapses in the central GPe. VGAT and gephyrin are located in different subcellular compartments (axon versus dendrite) and appear “colocalized” only at synaptic junctions because of their extremely close proximity. Details of this quantification method have been previously described, and techniques such as electron microscopy and electrophysiology have been used to verify this method (Eroglu et al., 2009; Stogsdill et al., 2017; Ippolito and Eroglu, 2010). We found a dramatic (~50%) reduction in GABAergic synapse number in the GPe of 2-month-old IP-cKO mice compared with controls (Figure 4C). We found no difference in the number of inhibitory synapses in the SNR of 2-month-old IP-cKO mice compared with controls, suggesting that deletion of *Htt* in IP-SPNs affects only GPe inhibitory synapses (Figures S4A and S4B). The appearance of colocalized VGAT/gephyrin puncta in these analyses was not due to chance, because randomization of the puncta by rotating the gephyrin channel 90° eliminated the vast majority of colocalized puncta (Figures S4C–S4F).

Next, we measured miniature inhibitory postsynaptic currents (mIPSCs) of central GPe neurons from 2-month-old IP-cKOs and IP-controls. In line with the decrease in structural synapse number, the frequency of mIPSCs was significantly reduced in 2-month-old IP-cKO mice compared with controls, whereas mIPSC amplitude did not differ (Figures 4D–4F). Taken together, these results show that IP-cKO reduces the number and function of GPe inhibitory synapses, and suggest that reduced GPe inhibition by IP-SPNs drives the hyperactive motor behavior of IP-cKO mice.

### Loss of Huntingtin in DP-SPNs Leads to Increased Inhibition in the SNR and Enhanced Collateral Connections to the GPe

Given that DP-cKO mice display hypoactive motor behavior, we asked whether loss of *Htt* decreases inhibitory synapse numbers and/or activity in the SNR. Quantification of inhibitory synapses (VGAT<sup>+</sup>/gephyrin<sup>+</sup>) in the dorsal SNR (lateral to midline, 1.95 to 1.525 mm) of 2-month-old mice revealed no significant difference in inhibitory synapse numbers of DP-cKOs compared with controls

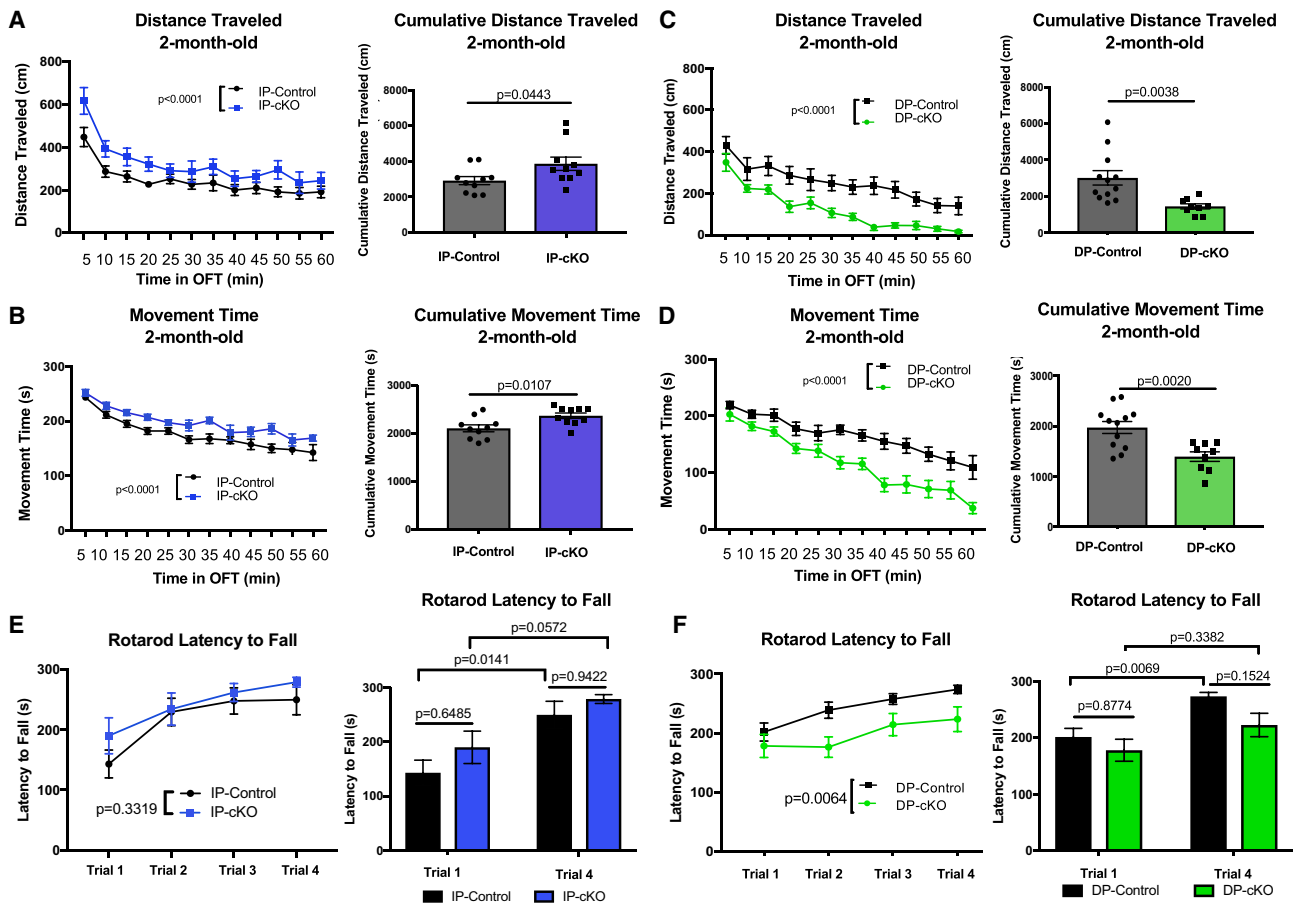

**Figure 3. Htt Is Required in SPNs for Normal Motor Function**

(A) Left: 2-month-old IP-cKOs were hyperactive in the open field test (OFT) compared with IP-controls ( $n = 10$  animals/genotype, analysis of covariance [ANCOVA] with Tukey's post hoc testing, mean squared error [MSE] = 14,481,  $df = 237$ ,  $p < 0.0001$ ). Right: IP-cKOs traveled a greater cumulative distance over the 60-min test window ( $n = 10$  animals/genotype, unpaired two-way t test,  $t = 2.163$ ,  $df = 18$ ,  $p = 0.0443$ ; graph displays mean  $\pm$  SEM).

(B) Left: 2-month-old IP-cKOs spent more time moving throughout the OFT compared with IP-controls ( $n = 10$  animals/genotype, ANCOVA with Tukey's post hoc testing, MSE = 721.69,  $df = 237$ ,  $p < 0.0001$ ). Right: IP-cKOs spent more time moving cumulatively over the 60-min test window ( $n = 10$  animals/genotype, unpaired two-way t test,  $t = 2.848$ ,  $df = 18$ ,  $p = 0.0107$ ; graph displays mean  $\pm$  SEM).

(C) Left: 2-month-old DP-cKOs were hypoactive in the OFT compared with DP-controls ( $n = 9-12$  animals/genotype, ANCOVA with Tukey's post hoc testing, MSE = 13,815,  $df = 249$ ,  $p < 0.0001$ ). Right: DP-cKOs traveled a shorter cumulative distance over the 60-min test window ( $n = 9-12$  animals/genotype, unpaired two-way t test,  $t = 3.299$ ,  $df = 19$ ,  $p = 0.0038$ ; graph displays mean  $\pm$  SEM).

(D) Left: 2-month-old DP-cKOs spent less time moving throughout the OFT compared with DP-controls ( $n = 9-12$  animals/genotype, ANCOVA with Tukey's post hoc testing, MSE = 1,588.9,  $df = 249$ ,  $p < 0.0001$ ). Right: DP-cKOs spent less time moving cumulatively over the 60-min test window ( $n = 9-12$  animals/genotype, unpaired two-way t test,  $t = 3.583$ ,  $df = 19$ ,  $p = 0.0020$ ; graph displays mean  $\pm$  SEM).

(E) Left: 2-month-old IP-cKOs did not significantly differ from IP-controls on the ART latency to fall ( $n = 10$  animals/genotype, two-way repeated-measures ANOVA of genotype  $F(1,18) = 0.9943$ ,  $p = 0.3319$ ). Right: IP-cKOs did not differ from controls on trial 1 or trial 4 latency to fall, and both genotypes displayed improvement between trials 1 and 4 (two-way ANOVA of genotype  $F(1,36) = 2.708$ ,  $p = 0.1085$ ; Sidak's multiple comparisons test  $p$  values displayed above; graph displays mean  $\pm$  SEM).

(F) Left: 2-month-old DP-cKOs had a shorter latency to fall on the ART ( $n = 9-12$  animals/genotype, two-way repeated-measures ANOVA of genotype  $F(1,19) = 9.380$ ,  $p = 0.0064$ ). Right: DP-cKOs did not significantly improve between trials 1 and 4 (two-way ANOVA of genotype  $F(1,38) = 5.641$ ,  $p = 0.0227$ ; Sidak's multiple comparisons test  $p$  values displayed above; graph displays mean  $\pm$  SEM).

See Figure S3.

(Figures 5A–5C). Furthermore, when we recorded mIPSCs from the dorsal SNRs of 2-month-old mice, mIPSC frequency was increased in DP-cKOs compared with DP-controls (Figures 5D and 5E). There was no difference in the mean amplitude of SNR mIPSCs in DP-cKOs, although the cumulative distributions were significantly different between genotypes (Figure 5F). Multiple fac-

tors can drive increased mIPSC frequency, including increased inhibitory synapse numbers or greater size of the readily releasable pool of vesicles. Given that we did not detect a change in the neuroanatomical number of inhibitory synapses in the SNR, the greater mIPSC frequency we observed is likely caused by an increase in release probability at these terminals.



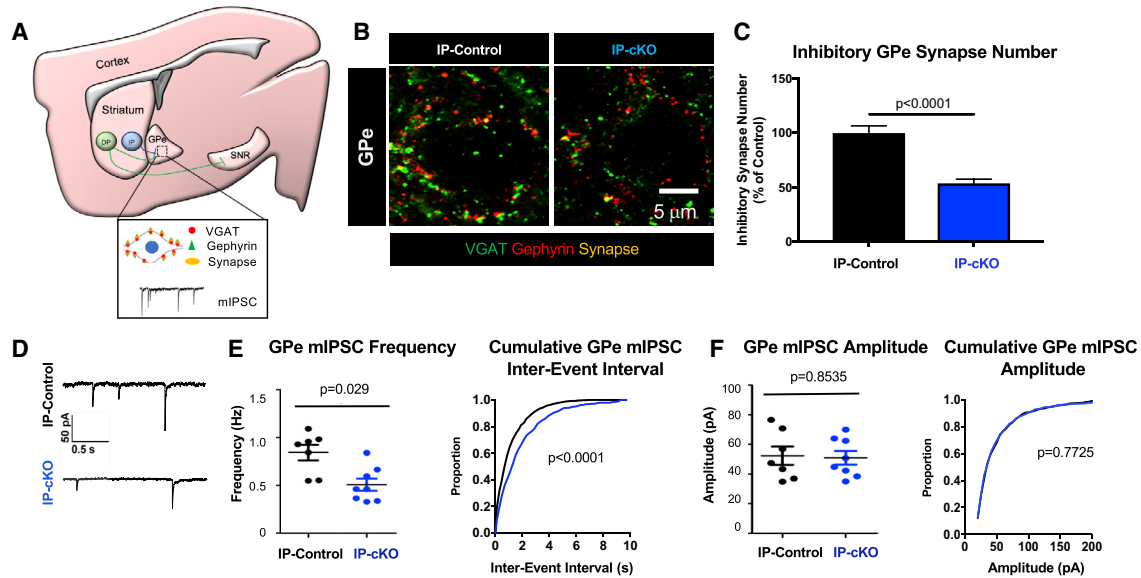

**Figure 4. IP-SPNs Require Htt for Proper Synaptic Connectivity and Function**

(A) Diagram of GPe synapse analysis approach of IP-controls and IP-cKOs. The GPe is stained for VGAT and gephyrin. “Colocalization” of VGAT and gephyrin marks GABAergic inhibitory synapses. Miniature inhibitory postsynaptic currents (mIPSCs) were recorded from medial GPe neurons.

(B) Representative images of inhibitory synapses in the GPe of 2-month-old IP-controls and IP-cKOs stained for VGAT (green) and gephyrin (red).

(C) Inhibitory synapse numbers are reduced in the GPe of 2-month-old IP-cKO mice compared with controls ( $n = 3\text{--}4$  replicates/animal, 3 animals/genotype, 110 total images analyzed, nested ANOVA by genotype,  $F = 44.26$ ,  $df = 1$ ,  $p < 0.0001$ ; graph displays mean  $\pm$  SEM).

(D) Sample mIPSC traces from 2-month-old IP-control and IP-cKO medial GPe neurons.

(E) Left: the mean frequency of GPe mIPSCs is reduced in 2-month-old IP-cKOs compared with IP-controls ( $n = 7\text{--}8$  cells per genotype, unpaired two-way t test,  $p = 0.0056$ ,  $t = 3.309$ ,  $df = 13$ ; graph displays mean  $\pm$  SEM). Right: the distribution of GPe mIPSC inter-event interval cumulative probability differs between 2-month-old IP-cKOs and IP-controls (Kolmogorov-Smirnov test,  $p < 0.0001$ ).

(F) Left: there is no difference in the mean amplitude of GPe mIPSCs of 2-month-old IP-cKOs compared with IP-controls ( $n = 7\text{--}8$  cells per genotype, unpaired two-way t test,  $p = 0.8535$ ,  $t = 0.1883$ ,  $df = 13$ ; graph displays mean  $\pm$  SEM). Right: the distribution of GPe mIPSC amplitude cumulative probability does not differ between 2-month-old IP-cKOs and IP-controls (Kolmogorov-Smirnov test,  $p = 0.7725$ ).

See Figure S4.

The alterations in the GABAergic synapse number and function that we observed within the SNR and GPe of DP-cKOs do not fully explain the hypoactive motor behavior of DP-cKO mice. One reason for this could be that the SNR may not receive inhibitory inputs solely from DP-SPNs. Thus, to isolate the specific functional properties of DP-SPN synapses within the SNR, we used optogenetics to specifically activate DP-SPN terminals upon stimulation with blue light. Two-month-old DP-cKO and control mice received a single intrastriatal injection of a Cre-dependent channelrhodopsin virus (AAV-LSL-ChR2) (Figure S5A). Acute slices containing the SNR were prepared 3 weeks later, and evoked inhibitory postsynaptic currents (eIPSCs) of dorsal SNR neurons were recorded while blue light bursts were applied to the SNR (Figure S5B). We found a trending reduction in paired pulse ratio between DP-cKOs and controls (Figure S5C). Additionally, DP-cKO response kinetics differed significantly between genotypes. Specifically, the decay time and width of eIPSCs were reduced in DP-cKOs, with no change in the rise time (Figures S5D–S5F). The reduced decay and width kinetics could be caused by multiple factors, such as decreased presynaptic GABA reuptake or altered postsynaptic GABA receptor subunit expression.

Approximately 60% of DP-SPNs send collateral projections through the GPe (Figure 1E). Interestingly, we found significantly

more GPe inhibitory synapses of 2-month-old DP-cKOs compared with age-matched DP-controls (Figures 5G–5I). However, when we recorded mIPSCs from the GPe of DP-cKOs, the mIPSC frequency and amplitudes were similar to those recorded from DP-controls (Figures 5J–5L). Rotation analysis of GPe and SNR synapses substantially reduced the number of colocalized puncta, confirming that VGAT/gephyrin colocalization in these samples was not random (Figures S5G–S5J).

Taken together, these results show that, unlike IP-cKO, loss of *Htt* in DP-SPNs does not decrease the number of inhibitory synapses formed at their principal target, the SNR. Instead, DP-cKO enhances inhibitory synaptic activity in the SNR and leads to increased inhibitory synapse numbers in the GPe either by increasing DP-SPN bridging collateral synapses or by enhancing IP-SPN connectivity.

#### Impaired Motor Function Due to SPN *Htt* Deletion Is Maintained with Aging

We next investigated the function of HTT in the SPNs in middle-aged mice (10 months old), analogous to when many human HD patients begin displaying severe motor symptoms and SPN degeneration (Walker, 2007). Similar to 2-month-old mice, 10-month-old IP-cKO mice were hyperactive in the OFT. IP-cKO

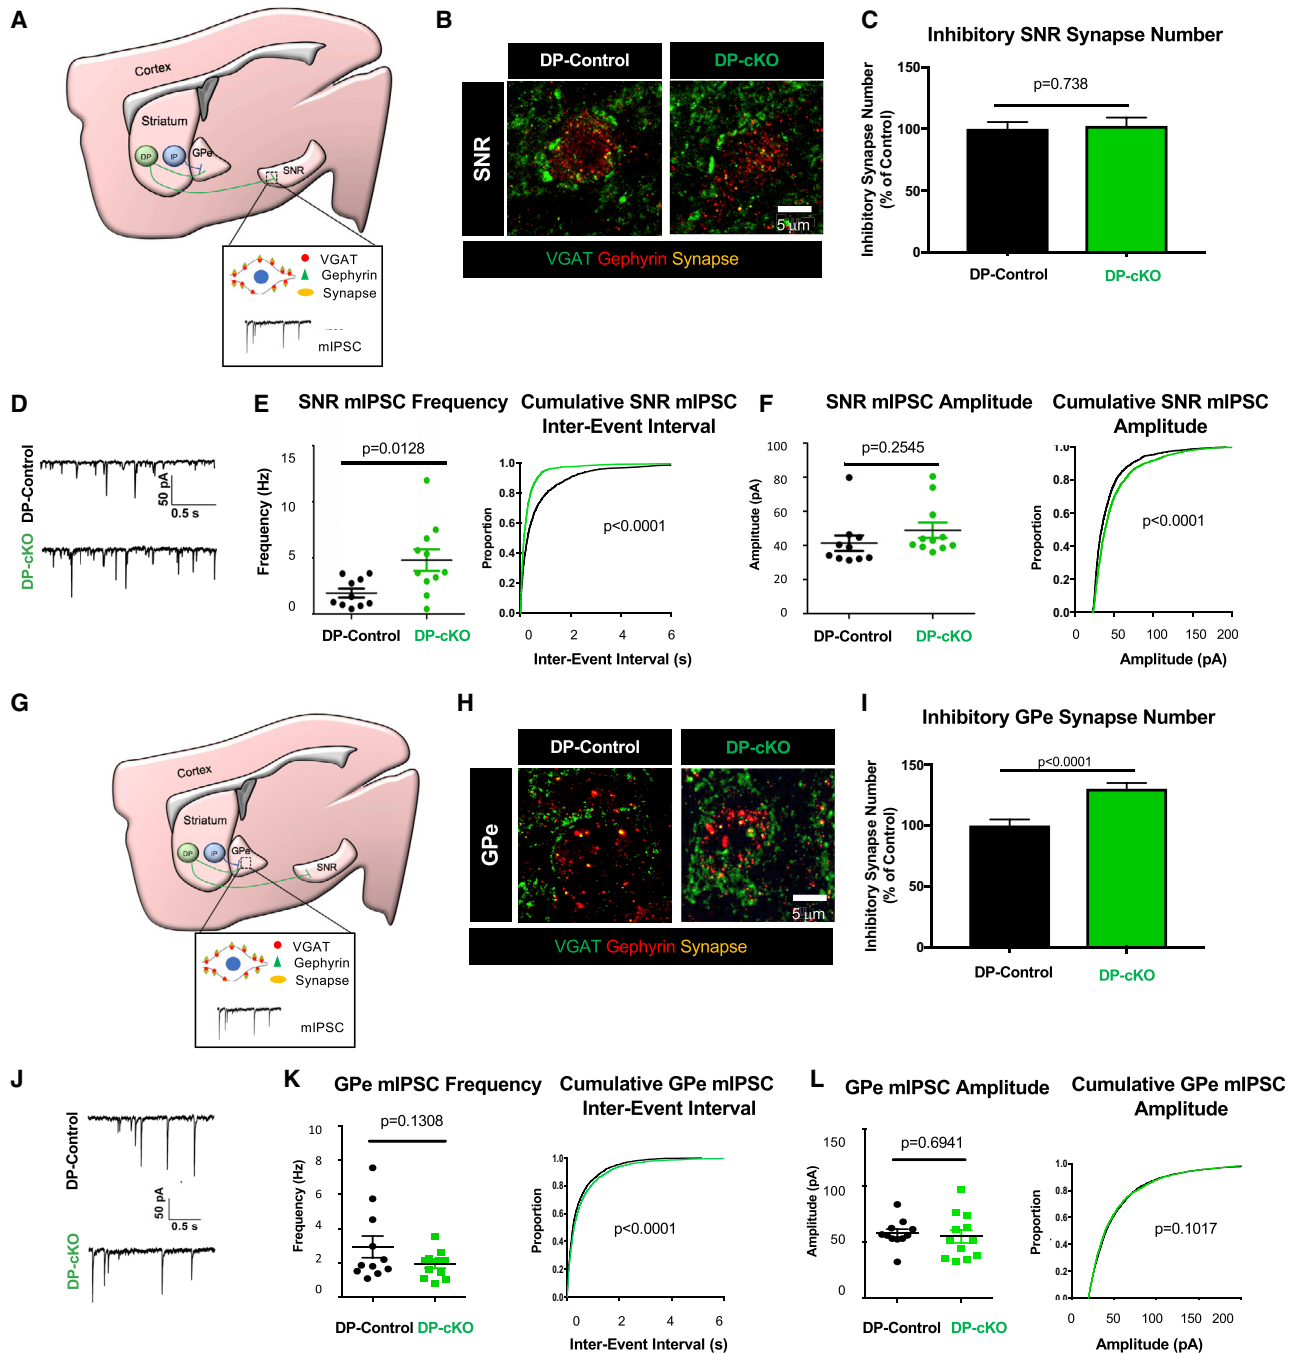

**Figure 5. DP-cKO Leads to Increased Inhibition in the SNR and Enhanced GPe Synapses**

(A) Diagram of SNR synapse analyses of DP mice. GABAergic synapse staining with presynaptic VGAT (green) and postsynaptic gephyrin (red) in dorsal SNR neurons. Miniature inhibitory postsynaptic currents (mIPSCs) were recorded from dorsal SNR neurons.

(B) Representative images of inhibitory synapses in the SNR of 2-month-old DP-control and DP-cKO mice stained for VGAT (green) and gephyrin (red).

(C) Quantification of SNR inhibitory synapses of 2-month-old DP-controls and DP-cKOs ( $n = 3$  replicates/animal, 3 animals/genotype, 90 images analyzed, nested ANOVA by genotype,  $F = 0.11292$ ,  $df = 1$ ,  $p = 0.73769$ ; graph displays mean  $\pm$  SEM).

(D) Sample traces of mIPSCs from 2-month-old DP-control and DP-cKO dorsal SNR neurons.

(E) Left: quantification of the mean frequency of mIPSCs ( $n = 10$ – $11$  cells per genotype, unpaired two-way t test,  $p = 0.0128$ ,  $t = 2.749$ ,  $df = 19$ , graph displays frequencies from individual neurons as well as mean  $\pm$  SEM). Right: cumulative probability plots of inter-event interval (Kolmogorov-Smirnov test,  $p < 0.0001$ ).

(F) Left: quantification of the mean amplitude of mIPSCs ( $n = 10$ – $11$  cells per genotype, unpaired two-way t test,  $p = 0.2545$ ,  $t = 1.175$ ,  $df = 19$ , graph displays frequencies from individual neurons as well as mean  $\pm$  SEM). Right: cumulative probability plots of mIPSC amplitude (Kolmogorov-Smirnov test,  $p < 0.0001$ ).

(legend continued on next page)

mice traveled a greater distance and spent more time moving compared with controls (Figures 6A and 6B). IP-cKO mice traveled a greater distance only during the first 30 min of the OFT, although they spent more time moving during both the first and last 30 min of the test (Figures S6A and S6B).

Conversely, 10-month-old DP-cKOs were hypoactive in the OFT, traveling a shorter distance and spending less time moving compared with controls (Figures 6C and 6D). DP-cKOs displayed normal levels of locomotor activity during the first part of the OFT, but their activity levels dropped off sharply during the final half of the test (Figures S6C and S6D). Neither 10-month-old IP-cKO nor DP-cKO mice differed from controls in terms of their stereotypic episodes (Figure S6E). However, IP-cKO mice spent less time in the margins of the open field, potentially reflecting their increased activity and reduced time spent still in any one area (Figure S6F).

Consistent with their performance at 2 months old, 10-month-old IP-cKO mice did not display significant impairments on the ART (Figure 6E). However, 10-month-old DP-cKOs were severely impaired in motor coordination on the ART (Figure 6F). In sum, we found that the motor dysfunctions of IP-cKO and DP-cKO mice are maintained and intensified with aging.

### Huntingtin Deletion Leads to SPN Loss with Aging

To determine whether loss of *Htt* in IP-SPNs or DP-SPNs affects SPN survival with aging, we used our cell counting strategy outlined in Figure 2 to count >6,100 TdTomato<sup>+</sup> and >10,000 DARPP32<sup>+</sup> SPNs per genotype in 10-month-old striata (Figure 7A). We observed a significant reduction in the density of IP-SPNs in 10-month-old IP-cKO mice compared with IP-controls (Figures 7B and S7A). The total density of DARPP-32<sup>+</sup> SPNs in IP-cKOs was reduced, an effect driven by the reduction in IP-SPN density (Figure S7B). We also found a dramatic reduction in DP-SPN density in 10-month-old DP-cKO mice compared with DP-controls (Figure 7B). DP-SPN density was reduced across the dorsal, medial, and ventral striatum (Figures S7C and S7D). These findings show that HTT is required in SPNs for neuronal survival during aging. It is possible that the cell death observed in DP-cKOs is stronger than in IP-cKOs because D1-Cre also deletes *Htt* in a subset of cortical neurons (Figures S1A–S1C), exacerbating the loss-of-function phenotypes in these mice.

We next sought to determine the mechanism by which DP-SPNs die in DP-cKOs with aging because the cell loss phenotype at 10 months of age was substantially stronger in these

mice. First, we stained 2- and 10-month-old DP-control and DP-cKO dorsal striatum for cleaved caspase-3 (CC3), which is highly upregulated by cells undergoing apoptosis (Figure S7E). Although sparse CC3 puncta were detected in the striatum of 10-month-old mice, there was no difference in CC3 expression between genotypes, suggesting that *Htt* cKO does not cause SPNs to die via apoptosis (Figure S7F). Interestingly, how SPNs die in HD is not yet known, but apoptosis is not thought to be the main cause (Hickey and Chesselet, 2003).

Reactive astrogliosis is classically observed in the striatum of HD patients when SPNs are dying, and the degree of gliosis directly correlates with the severity of HD pathology (Vonsattel et al., 1985). Thus, we stained 2- and 10-month-old DP brains for glial fibrillary acidic protein (GFAP), which is expressed at low levels in striatal astrocytes but is upregulated with reactivity, and for SRY-Box transcription factor 9 (SOX9), a marker for astrocytic nuclei in adult mouse CNS (Figures 7C–7F) (Khakh, 2019; Sun et al., 2017). We found a striking increase in GFAP expression in 10-month-old DP-cKO striatum compared with controls, with no difference between genotypes at 2 months old (Figures 7C–7E). Similarly, there was a substantial increase in the number of SOX9<sup>+</sup> astrocytes in the striatum of 10-month-old DP-cKOs compared with controls, with no difference present between genotypes at 2 months old (Figures 7F and 7G).

Reactive astrogliosis and neuronal loss are often accompanied by alterations in microglia number, morphology, and phagocytic activity in HD brains (Sapp et al., 2001). We labeled microglia with microglial marker ionized calcium-binding adapter molecule 1 (IBA-1) in DP-cKO and control brains, and found significantly more microglia in the dorsal striatum of 10-month-old DP-cKOs compared with controls (Figures 7H and 7I). Next, we stained the same tissue for CD68, which marks the phagocytic compartment of microglia, and used Imaris Software to create 3D surface reconstructions of individual microglia and the CD68 within them (Figure 7J). We found that the average microglia cell volume was increased in 10-month-old DP-cKOs, concurrent with a slight reduction in CD68 volume within DP-cKO microglia cells (Figures 7K and 7L). Taken together, these results show that loss of *Htt* in DP-SPNs leads to non-apoptotic cell death and reactive gliosis reminiscent of HD brains.

### DISCUSSION

Although HD is caused by a well-characterized CAG repeat mutation of *Htt*, the cellular and molecular mechanisms of

(G) Diagram of GPe synapse analysis approach. GABAergic synapse staining with presynaptic VGAT (green) and postsynaptic gephyrin (red) in the GPe. mIPSCs were recorded from neurons in the medial GPe.

(H) Representative images of inhibitory synapses in the GPe of 2-month-old DP-control and DP-cKO mice stained for VGAT (green) and gephyrin (red).

(I) Quantification of inhibitory synapses in the GPe of 2-month-old DP-controls and DP-cKOs ( $n = 3$  replicates/animal, 3 animals/genotype, 90 images analyzed, nested ANOVA by genotype,  $F = 20.462$ ,  $df = 1$ ,  $p < 0.0001$ ; graph displays mean  $\pm$  SEM).

(J) Sample traces of mIPSCs from 2-month-old DP-control and DP-cKO GPe neurons.

(K) Left: quantification of the mean frequency of GPe mIPSCs ( $n = 11$ – $12$  cells per genotype, unpaired two-way  $t$  test,  $p = 0.1308$ ,  $t = 1.572$ ,  $df = 21$ , graph displays frequencies from individual neurons as well as mean  $\pm$  SEM). Right: cumulative probability plots of inter-event interval (Kolmogorov-Smirnov test,  $p < 0.0001$ ).

(L) Left: quantification of the mean amplitude of GPe mIPSCs ( $n = 11$ – $12$  cells per genotype, unpaired two-way  $t$  test,  $p = 0.6941$ ,  $t = 0.3987$ ,  $df = 21$ , graph displays frequencies from individual neurons as well as mean  $\pm$  SEM). Right: cumulative probability plots of the mIPSC amplitude (Kolmogorov-Smirnov test,  $p = 0.1017$ ).

See Figure S5.

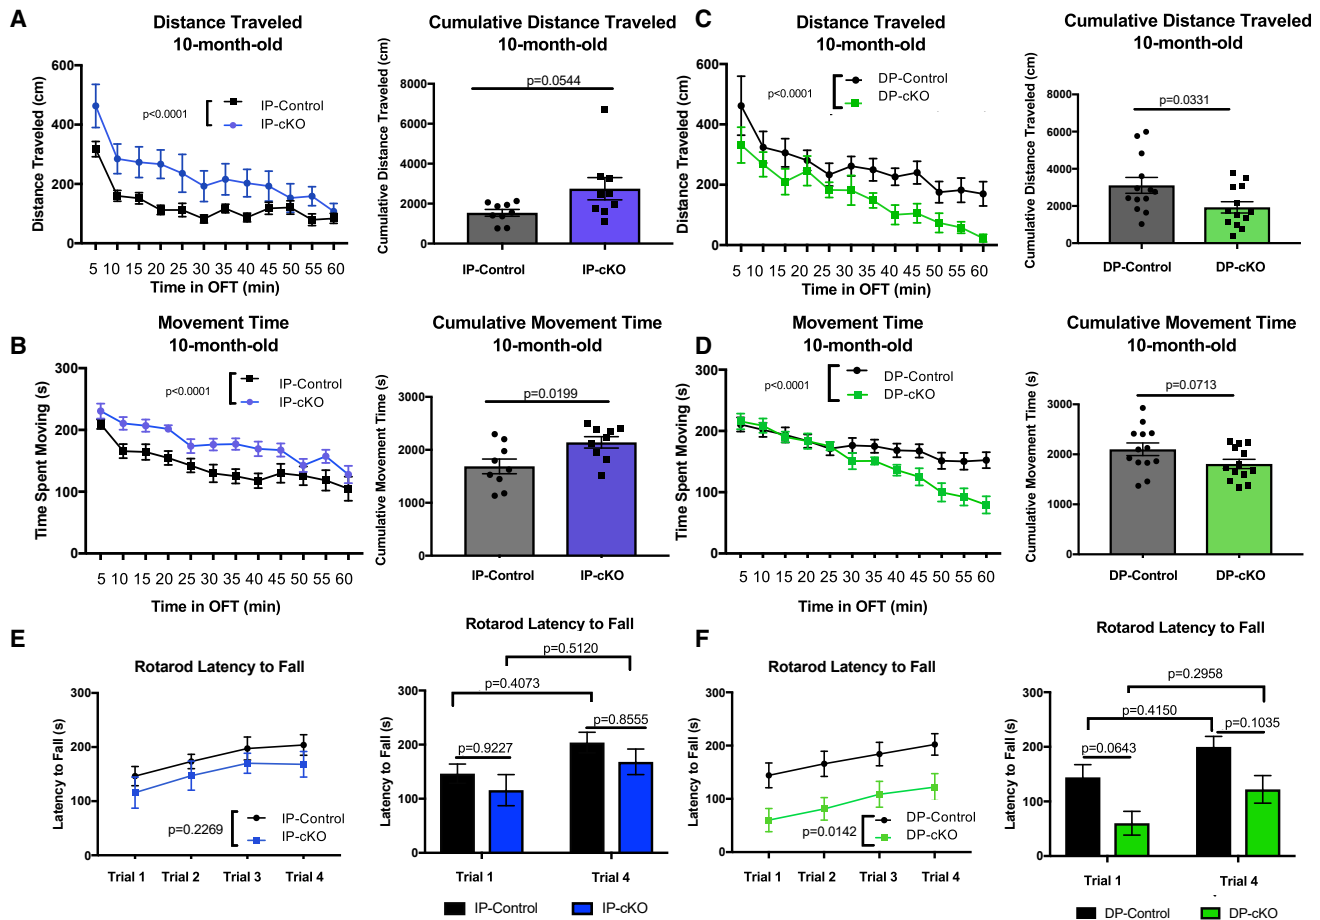

**Figure 6. Behavioral Deficits in *Htt* cKO Mice Persist with Aging**

(A) Left: 10-month-old IP-cKOs were hyperactive in the open field test (OFT) compared with IP-controls ( $n = 9$  animals/genotype, analysis of covariance [ANCOVA] with Tukey's post hoc testing,  $MSE = 14,106$ ,  $df = 213$ ,  $p < 0.0001$ ). Right: IP-cKOs displayed a trending increase in cumulative distance traveled over the 60-min test window ( $n = 9$  animals/genotype, unpaired two-way t test,  $t = 2.075$ ,  $df = 16$ ,  $p = 0.0544$ ; graph displays mean  $\pm$  SEM).

(B) Left: 10-month-old IP-cKOs spent more time moving compared with IP-controls ( $n = 9$  animals/genotype, ANCOVA with Tukey's post hoc testing,  $MSE = 1,311.2$ ,  $df = 213$ ,  $p < 0.0001$ ). Right: IP-cKOs spent more cumulative time moving compared with controls ( $n = 9$  animals/genotype, unpaired two-way t test,  $t = 2.587$ ,  $df = 16$ ,  $p = 0.0199$ ; graph displays mean  $\pm$  SEM).

(C) Left: 10-month-old DP-cKOs were hypoactive in the OFT compared with IP-controls ( $n = 13$  animals/genotype, ANCOVA with Tukey's post hoc testing,  $MSE = 22207$ ,  $df = 309$ ,  $p < 0.0001$ ). Right: DP-cKOs traveled a cumulative shorter distance compared with controls ( $n = 13$  animals/genotype, unpaired two-way t test,  $t = 2.261$ ,  $df = 24$ ,  $p = 0.0331$ ; graph displays mean  $\pm$  SEM).

(D) Left: 10-month-old DP-cKOs spent less time moving in the OFT compared with IP-controls ( $n = 13$  animals/genotype, ANCOVA with Tukey's post hoc testing,  $MSE = 1839.7$ ,  $df = 309$ ,  $p < 0.0001$ ). Right: DP-cKOs displayed a trending decrease in cumulative time spent moving compared with controls ( $n = 13$  animals/genotype, unpaired two-way t test,  $t = 1.887$ ,  $df = 24$ ,  $p = 0.0713$ ; graph displays mean  $\pm$  SEM).

(E) Left: 10-month-old IP-cKOs did not differ from IP-controls on ART latency to fall ( $n = 9$  animals/genotype, two-way repeated-measures ANOVA of genotype  $F(1,16) = 1.579$ ,  $p = 0.2269$ ). Right: IP-cKOs did not differ from controls on trial 1 or trial 4 latency to fall, and neither group displayed statistically significant improvement between trials 1 and 4 (two-way ANOVA of genotype  $F(1,32) = 2.128$ ,  $p = 0.1544$ ; Sidak's multiple comparisons test p values displayed above; graph displays mean  $\pm$  SEM).

(F) Left: 10-month-old DP-cKOs had a significantly shorter latency to fall on the ART ( $n = 9$  animals/genotype, two-way repeated-measures ANOVA of genotype  $F(1,24) = 6.986$ ,  $p = 0.0142$ ). Right: DP-cKOs displayed a trending reduction in latency to fall during trials 1 and 4 compared with controls, although neither group displayed significant improvement between trials 1 and 4 (two-way ANOVA of genotype  $F(1,48) = 12.97$ ,  $p = 0.0007$ ; Sidak's multiple comparisons test p values displayed above; graph displays mean  $\pm$  SEM).

See Figure S6.

HD pathogenesis remain elusive. Here, we show that *Htt* loss in SPNs leads to dysfunctional motor behavior with concurrent abnormal synaptic connectivity, nuclear morphology, and changes in SPN gene expression. Importantly, *Htt* deletion leads to SPN loss with aging and reactive gliosis, all reminis-

cent of HD neuropathology. Thus, our findings show that *Htt* loss in SPNs mimics key features of HD, offering insights into functions of HTT in the striatum and providing strong evidence that loss-of-function mechanisms contribute to SPN pathology in HD.

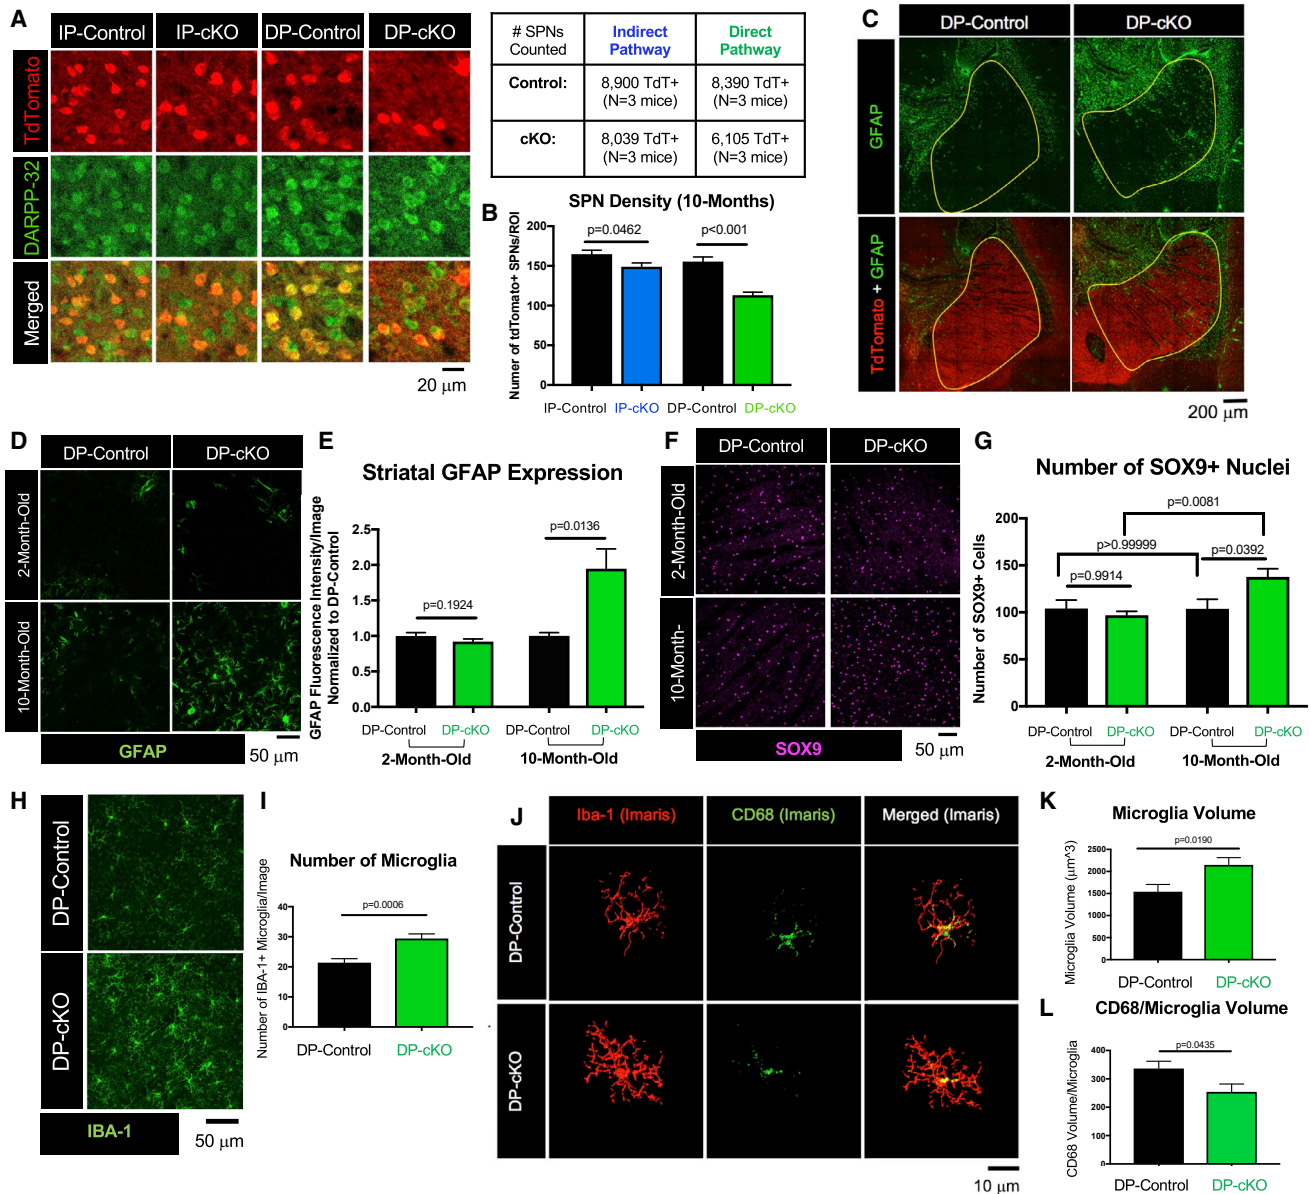

**Figure 7. *Htt* Is Required for SPN Survival with Aging**

(A) Representative images of striatum from 10-month-old IP-control, IP-cKO, DP-control, and DP-cKO mice stained for TdTomato (red, Cre<sup>+</sup> SPNs) and DARPP-32 (green, all SPNs). Number of cells counted per mice analyzed is displayed in the table.

(B) There are fewer IP-SPNs in 10-month-old IP-cKOs compared with IP-controls, and fewer DP-SPNs in 10-month-old DP-cKOs compared with DP-controls (n = 3 mice/genotype, 6 images/mouse, one-way ANOVA with Sidak's multiple comparisons test, F(3,104) = 21.3, p values above; graph displays mean ± SEM).

(C) Representative tile scans of 10-month-old DP-control and DP-cKO brains stained for GFAP (green) and TdTomato (red). Yellow boundary demarcates the striatum.

(D) Representative close-up images of 2- and 10-month-old DP-control and DP-cKO dorsal striatum stained for GFAP (green).

(E) GFAP fluorescent intensity (integrated density) was increased in the striatum of 10-month-old DP-cKO mice (2 month-old: n = 4 images/mouse, 3 mice/genotype, unpaired two-way t test, t = 1.345, df = 22, p = 0.1924; 10 month-old: n = 2–3 images/mouse, 2–3 mice/genotype, unpaired two-way t test, t = 2.889, df = 12, p = 0.0136; graph displays mean ± SEM).

(F) Representative images of 2- and 10-month-old DP-control and DP-cKO striatum stained for SOX9 (magenta).

(G) There are more SOX9<sup>+</sup> astrocytes in 10-month-old DP-cKO striatum compared with DP-controls, with no difference at 2 months old (n = 4 images/animal, 3 animals/genotype, one-way ANOVA, F(3, 43) = 4.671, p = 0.0065, Sidak's multiple comparisons test for within-region comparisons, p values above; graph displays mean ± SEM).

(H) Representative images of 10-month-old DP-control and DP-cKO striatum stained for Iba-1 (green).

(I) There are more microglia in the striatum of 10-month-old DP-cKO mice relative to DP-controls (n = 3 mice/genotype, 3–5 images/mouse, unpaired two-way t test, t = 3.885, df = 26, p = 0.0006; graph displays mean ± SEM).

(legend continued on next page)

### HTT Is Required in SPNs for the Integrity of the Basal Ganglia Circuit

Synaptic dysfunction is a feature of many neurodegenerative diseases, including HD. Many individuals carrying the HD mutation have abnormal brain circuit function that is evident well before motor symptom onset (Unschuld et al., 2012). Several mouse models of HD display aberrant synaptic connectivity preceding both motor dysfunction and neuronal loss (McKinstry et al., 2014; Milnerwood and Raymond, 2007; Deng et al., 2013). Here, we found that selective loss of *Htt* in IP-SPNs or DP-SPNs disrupts synaptic connectivity, suggesting that *Htt* loss-of-function in SPNs may also contribute to the synaptic dysfunction in HD. IP-cKO dramatically reduced the number and function of inhibitory synaptic connections onto their target GPe. Behaviorally, IP-cKO mice were hyperactive, likely due to reduced inhibition of the GPe. This is intriguing because loss of GPe inhibition is predicted to be the cause of several symptoms associated with early HD, including hyperkinesia and chorea (Deng et al., 2004; Reiner et al., 1988). We also found more inhibitory synapses within the GPe of DP-cKOs, potentially arising from an increase in GPe bridging collaterals formed by DP-SPNs. Taken together, our findings indicate that loss of *Htt* alters GPe connectivity of SPNs, albeit in opposite directions. Further work is needed to determine why the SPN subtypes and their synaptic connections are differentially affected by *Htt* deletion and whether these differences underlie their differing susceptibilities to *Htt* loss.

### SPNs Require HTT for the Maintenance of Cell Health and Gene Expression

*Htt* deletion from SPNs adversely affects SPN health and function long before neurodegeneration occurs. For instance, *Htt* cKO alters the expression of SPN-enriched genes, including pENK and DARPP-32. Changes in SPN gene expression have been observed in HD patients and many HD models (Hodges et al., 2006; Mazarei et al., 2010; Luthi-Carter et al., 2000; Bibb et al., 2000; Ament et al., 2017; Langfelder et al., 2016). DARPP-32, which was strongly downregulated both in cKO SPNs and in HD, is a downstream regulator of dopaminergic signaling in SPNs. Intriguingly, cKO of *DARPP-32* in IP-SPNs or DP-SPNs causes motor behavior deficits (hyperactivity versus hypoactivity, respectively), similar to what we observed here (Bateup et al., 2010). Therefore, the motor dysfunction caused by *Htt* cKO in SPNs may be partly mediated by DARPP-32 reduction in these cells.

How does *Htt* loss alter SPN gene expression? HTT interacts with several transcriptionally active proteins, such as SP-1 and REST/dynactin p150Glued (Zhai et al., 2005; Shimojo, 2008). HTT may also modulate transcription by binding directly to DNA (Benn et al., 2008). In addition, HTT interacts with Polycomb Repressive Complex 2 (PRC2) subunits, which catalyze histone

H3K27 methylation. Embryos lacking HTT have disrupted PRC2-mediated regulation of gene expression (Seong et al., 2010). Similar to our findings in *Htt* cKOs, PRC2 loss-of-function in SPNs leads to neurodegeneration (Von Schimmelmann et al., 2016). Therefore, *Htt* loss in SPNs may disrupt PRC2-dependent regulation of SPN-specific genes.

Our findings also suggest that SPNs require HTT for maintaining proper nuclear structure. Nuclear invaginations, impaired nucleocytoplasmic transport, and disrupted nuclear pore complexes are associated with HD (Kutscher and Shaham, 2017; Grima et al., 2017). Tightly regulated nuclear structure and function is critical for transcriptional integrity. Nuclear crenellation is also a feature of developmentally programmed linker cell death in *C. elegans*, which is controlled by a polyQ-containing protein (Abraham et al., 2007). The death of the linker cell, which regulates male reproductive system organization, occurs independently of classic apoptotic pathways. Nuclear invagination is also apparent in dying cells in HD brains, suggesting that changes to the nuclear structure may be related to a non-apoptotic degenerative mechanism (Kutscher and Shaham, 2017).

Nuclear invaginations also occur transiently in response to synaptic activity (Wittmann et al., 2009). For instance, activity-dependent nuclear infolding plays a role in enhancing the relay of calcium signals to the nucleus. Future work is needed to discern whether abnormalities in nuclear structure are a direct consequence of *Htt* loss or are a byproduct of synaptic dysfunction induced by SPN wiring errors, and to determine whether they underlie abnormal gene expression and/or degeneration observed in cKO SPNs.

### Loss of *Htt* in SPNs Partially Recapitulates Several HD-like Phenotypes

The precise mechanisms of SPN death in HD remain unknown. We found that *Htt* loss in either SPN subtype disrupts motor function and drives aging-related neuronal loss accompanied by reactive gliosis. Therefore, three main aspects of HD pathology, abnormal motor function, reactive gliosis, and SPN death, can be partially produced by *Htt* loss-of-function in SPNs. Previous studies have shown that loss of *Htt* in forebrain neurons (Dragatsis et al., 2000) or cortex (Dragatsis et al., 2018) leads to widespread cell death, reduced cortical volume, and abnormal motor behavior. However, the pattern of degeneration does not resemble the striatum-specific SPN loss seen in HD. Deleting *Htt* from cells of subpallidal lineage using *Gsx2-Cre* causes hyperlocomotion during early adulthood and aging-dependent neuronal loss (Mehler et al., 2019). However, *Gsx2-Cre* is not specific for SPNs; all progenitors from the lateral ganglionic eminence are targeted, including oligodendrocytes and interneurons.

Synaptic dysfunction in the cortico-striatal axis is an early event in HD and likely an important trigger for HD pathology

(J) Imaris 3D surface reconstructions of 10-month-old DP-control and DP-cKO striatal microglia stained for IBA-1 (red) and CD68 (green).

(K) Microglia volume is increased in 10-month-old DP-cKO mice ( $n = 2$  mice/genotype, 5–10 microglial cells/mouse, unpaired two-way  $t$  test,  $t = 2.501$ ,  $df = 26$ ,  $p = 0.0190$ ; graph displays mean  $\pm$  SEM).

(L) CD68 volume per microglia of 10-month-old DP-cKOs was reduced relative to DP-controls ( $n = 3$  mice/genotype, 8–15 microglia analyzed per mouse, unpaired two-way  $t$  test,  $t = 3.534$ ,  $df = 18$ ,  $p = 0.0024$ ; graph displays mean  $\pm$  SEM).

See Figure S7.

(Unschuld et al., 2012). Furthermore, HTT expression is higher in cortical pyramidal neurons rather than the SPNs, where it functions to control synapse development (McKinstry et al., 2014; Fusco et al., 1999). Therefore, it is possible that cortical D1-Cre expression may contribute to the severity of phenotypes of DP-cKO mice. HTT loss in D1-Cre<sup>+</sup> cortical neurons could alter their functional connectivity onto SPNs, which may contribute to synaptic circuit and/or behavioral phenotypes of DP mice and exacerbate the neuronal health issues caused by HTT loss in DP-SPNs.

The toxic gain-of-function and dominant-negative loss-of-function mechanisms of mHTT are not mutually exclusive, and both mechanisms likely contribute to SPN degeneration and other aspects of HD pathology. mHTT, especially in the soluble form, is toxic and can accelerate the rate of cell death (Arrasate et al., 2004). However, overexpressing wild-type HTT in cells also expressing mHTT slows cell death, suggesting a neuroprotective role for HTT (Leavitt et al., 2006). Therefore, it is likely that synaptic dysfunction in cortico-striatal circuits and cellular stress from protein aggregation synergize with the loss-of-function-like effects of mHTT in SPNs to produce the complex HD phenotypes.

### Implications for HD Therapeutic Strategies

Our findings have significant implications for HD therapeutics, because many strategies seeking to cure HD aim to silence *Htt* expression. One such therapeutic currently in clinical trials (IONIS-HTTRx, ClinicalTrials.org: NCT03342053) employs an intrathecal antisense oligonucleotide to non-selectively target the human *HTT* gene and reduce HTT expression in HD mutation carriers (Rodrigues and Wild, 2018). Although several studies in rodent and non-human primate models have shown that *Htt* knockdown in adult animals is not harmful (Wang et al., 2016a; McBride et al., 2011; Boudreau et al., 2009), one study found that *Htt* deletion in the adult mouse leads to brain atrophy, extensive reactive gliosis, and progressive motor symptoms (Dietrich et al., 2017). Our findings show that wild-type HTT plays an important role in both IP-SPNs and DP-SPNs, and preserving this function is critical for maintaining striatal health and function. As such, therapeutic strategies that selectively reduce the expression of mHTT (e.g., Li et al., 2019) are needed to provide the greatest benefit to HD patients.

### STAR★METHODS

Detailed methods are provided in the online version of this paper and include the following:

- KEY RESOURCES TABLE
- LEAD CONTACT AND MATERIALS AVAILABILITY
- EXPERIMENTAL MODEL AND SUBJECT DETAILS
  - *In Vivo* Experiments
- METHOD DETAILS
  - Flow Cytometry and qRT-PCR
  - Western Blot
  - Immunohistochemistry
  - Primary Antibodies used for Immunohistochemistry
  - Cell Number Quantifications

- Fluorescence Intensity Quantifications
- Nuclear Morphological Analysis
- Behavior
- GABAergic Synapse Quantification
- Electrophysiology
- Microglial Analysis using Imaris Software
- QUANTIFICATION AND STATISTICAL ANALYSIS
- DATA AND CODE AVAILABILITY

### SUPPLEMENTAL INFORMATION

Supplemental Information can be found online at <https://doi.org/10.1016/j.celrep.2019.12.069>.

### ACKNOWLEDGMENTS

This work was supported by the NIH (grant RO1 NS096352 to C.E., grant RO1 NS090914 to S.Z., grant RO1 NS094754 to H.H.Y., and grant F31 NRSA 106777-01 to C.J.B.), a Duke Chancellor's Discovery Award (to C.E. and H.H.Y.), and a Ruth K. Broad Biomedical Research Foundation's Research Award for Graduate Students (to C.J.B. and S.U.M.).

### AUTHOR CONTRIBUTIONS

C.J.B., S.U.M., H.H.Y., and C.E. conceived and planned experiments. C.J.B., S.U.M., M.I.O., Y.B.K., N.K., A.V.S., F.Y.F., A.M., and A.K.W. carried out the experiments. C.J.B., S.U.M., and N.K. analyzed the data. S.Z. and I.D. provided critical reagents. C.J.B., S.U.M., N.K., and C.E. wrote the manuscript, with feedback from H.H.Y., S.Z., and I.D.

### DECLARATION OF INTERESTS

The authors declare no competing interests.

Received: February 25, 2019

Revised: November 7, 2019

Accepted: December 17, 2019

Published: January 21, 2020

### REFERENCES

- Abraham, M.C., Lu, Y., and Shaham, S. (2007). A morphologically conserved nonapoptotic program promotes linker cell death in *Caenorhabditis elegans*. *Dev. Cell* 12, 73–86.
- Albin, R.L., Young, A.B., and Penney, J.B. (1989). The functional anatomy of basal ganglia disorders. *Trends Neurosci.* 12, 366–375.
- Alexander, G.E., and Crutcher, M.D. (1990). Functional architecture of basal ganglia circuits: neural substrates of parallel processing. *Trends Neurosci.* 13, 266–271.
- Ambrose, C.M., Duyao, M.P., Barnes, G., Bates, G.P., Lin, C.S., Srinidhi, J., Baxendale, S., Hummerich, H., Lehrach, H., Altherr, M., et al. (1994). Structure and expression of the Huntington's disease gene: evidence against simple inactivation due to an expanded CAG repeat. *Somat. Cell Mol. Genet.* 20, 27–38.
- Ament, S.A., Pearl, J.R., Grindeland, A., St Claire, J., Earls, J.C., Kovalenko, M., Gillis, T., Mysore, J., Gusella, J.F., Lee, J.M., et al. (2017). High resolution time-course mapping of early transcriptomic, molecular and cellular phenotypes in Huntington's disease CAG knock-in mice across multiple genetic backgrounds. *Hum. Mol. Genet.* 26, 913–922.
- Arrasate, M., Mitra, S., Schweitzer, E.S., Segal, M.R., and Finkbeiner, S. (2004). Inclusion body formation reduces levels of mutant huntingtin and the risk of neuronal death. *Nature* 431, 805–810.
- Bateup, H.S., Santini, E., Shen, W., Birnbaum, S., Valjent, E., Surmeier, D.J., Fisone, G., Nestler, E.J., and Greengard, P. (2010). Distinct subclasses of

- medium spiny neurons differentially regulate striatal motor behaviors. *Proc. Natl. Acad. Sci. USA* *107*, 14845–14850.
- Benn, C.L., Sun, T., Sadri-Vakili, G., McFarland, K.N., DiRocco, D.P., Yohrling, G.J., Clark, T.W., Bouzou, B., and Cha, J.H. (2008). Huntingtin modulates transcription, occupies gene promoters in vivo, and binds directly to DNA in a polyglutamine-dependent manner. *J. Neurosci.* *28*, 10720–10733.
- Bibb, J.A., Yan, Z., Svenningsson, P., Snyder, G.L., Pieribone, V.A., Horiuchi, A., Nairn, A.C., Messer, A., and Greengard, P. (2000). Severe deficiencies in dopamine signaling in presymptomatic Huntington's disease mice. *Proc. Natl. Acad. Sci. USA* *97*, 6809–6814.
- Boudreau, R.L., McBride, J.L., Martins, I., Shen, S., Xing, Y., Carter, B.J., and Davidson, B.L. (2009). Nonallele-specific silencing of mutant and wild-type huntingtin demonstrates therapeutic efficacy in Huntington's disease mice. *Mol. Ther.* *17*, 1053–1063.
- Cattaneo, E., Zuccato, C., and Tartari, M. (2005). Normal huntingtin function: an alternative approach to Huntington's disease. *Nat. Rev. Neurosci.* *6*, 919–930.
- Caviston, J.P., Ross, J.L., Antony, S.M., Tokito, M., and Holzbaur, E.L. (2007). Huntingtin facilitates dynein/dynactin-mediated vesicle transport. *Proc. Natl. Acad. Sci. USA* *104*, 10045–10050.
- Cazorla, M., de Carvalho, F.D., Chohan, M.O., Shegda, M., Chuhma, N., Rayport, S., Ahmari, S.E., Moore, H., and Kellendonk, C. (2014). Dopamine D2 receptors regulate the anatomical and functional balance of basal ganglia circuitry. *Neuron* *81*, 153–164.
- Davies, S.W., Turmaine, M., Cozens, B.A., DiFiglia, M., Sharp, A.H., Ross, C.A., Scherzinger, E., Wanker, E.E., Mangiarini, L., and Bates, G.P. (1997). Formation of neuronal intranuclear inclusions underlies the neurological dysfunction in mice transgenic for the HD mutation. *Cell* *90*, 537–548.
- Deng, Y.P., Albin, R.L., Penney, J.B., Young, A.B., Anderson, K.D., and Reiner, A. (2004). Differential loss of striatal projection systems in Huntington's disease: a quantitative immunohistochemical study. *J. Chem. Neuroanat.* *27*, 143–164.
- Deng, Y.P., Wong, T., Bricker-Anthony, C., Deng, B., and Reiner, A. (2013). Loss of corticostriatal and thalamostriatal synaptic terminals precedes striatal projection neuron pathology in heterozygous Q140 Huntington's disease mice. *Neurobiol. Dis.* *60*, 89–107.
- Dietrich, P., Johnson, I.M., Alli, S., and Dragatsis, I. (2017). Elimination of huntingtin in the adult mouse leads to progressive behavioral deficits, bilateral thalamic calcification, and altered brain iron homeostasis. *PLoS Genet.* *13*, e1006846.
- Dragatsis, I., Levine, M.S., and Zeitlin, S. (2000). Inactivation of Hdh in the brain and testis results in progressive neurodegeneration and sterility in mice. *Nat. Genet.* *26*, 300–306.
- Dragatsis, I., Dietrich, P., Ren, H., Deng, Y.P., Del Mar, N., Wang, H.B., Johnson, I.M., Jones, K.R., and Reiner, A. (2018). Effect of early embryonic deletion of huntingtin from pyramidal neurons on the development and long-term survival of neurons in cerebral cortex and striatum. *Neurobiol. Dis.* *111*, 102–117.
- Durieux, P.F., Bearzatto, B., Guiducci, S., Buch, T., Waisman, A., Zoli, M., Schiffmann, S.N., and de Kerchove d'Exaerde, A. (2009). D2R striatopallidal neurons inhibit both locomotor and drug reward processes. *Nat. Neurosci.* *12*, 393–395.
- Duyao, M., Ambrose, C., Myers, R., Novelletto, A., Persichetti, F., Frontali, M., Folstein, S., Ross, C., Franz, M., Abbott, M., et al. (1993). Trinucleotide repeat length instability and age of onset in Huntington's disease. *Nat. Genet.* *4*, 387–392.
- Duyao, M.P., Auerbach, A.B., Ryan, A., Persichetti, F., Barnes, G.T., McNeil, S.M., Ge, P., Vonsattel, J.P., Gusella, J.F., Joyner, A.L., et al. (1995). Inactivation of the mouse Huntington's disease gene homolog Hdh. *Science* *269*, 407–410.
- Elias, S., McGuire, J.R., Yu, H., and Humbert, S. (2015). Huntingtin Is Required for Epithelial Polarity through RAB11A-Mediated Apical Trafficking of PAR3-aPKC. *PLoS Biol.* *13*, e1002142.
- Eroglu, C., Allen, N.J., Susman, M.W., O'Rourke, N.A., Park, C.Y., Ozkan, E., Chakraborty, C., Mulinyawe, S.B., Annis, D.S., Huberman, A.D., et al. (2009). Gabapentin receptor  $\alpha 2\delta$ -1 is a neuronal thrombospondin receptor responsible for excitatory CNS synaptogenesis. *Cell* *139*, 380–392.
- Fusco, F.R., Chen, Q., Lamoreaux, W.J., Figueredo-Cardenas, G., Jiao, Y., Coffman, J.A., Surmeier, D.J., Honig, M.G., Carlock, L.R., and Reiner, A. (1999). Cellular localization of huntingtin in striatal and cortical neurons in rats: lack of correlation with neuronal vulnerability in Huntington's disease. *J. Neurosci.* *19*, 1189–1202.
- Gauthier, L.R., Charrin, B.C., Borrell-Pagès, M., Dompierre, J.P., Rangone, H., Cordelières, F.P., De Mey, J., MacDonald, M.E., Lessmann, V., Humbert, S., and Saudou, F. (2004). Huntingtin controls neurotrophic support and survival of neurons by enhancing BDNF vesicular transport along microtubules. *Cell* *118*, 127–138.
- Gerfen, C.R., Paletzki, R., and Heintz, N. (2013). GENSAT BAC cre-recombinase driver lines to study the functional organization of cerebral cortical and basal ganglia circuits. *Neuron* *80*, 1368–1383.
- Godin, J.D., Colombo, K., Molina-Calavita, M., Keryer, G., Zala, D., Charrin, B.C., Dietrich, P., Volvert, M.L., Guillemot, F., Dragatsis, I., et al. (2010). Huntingtin is required for mitotic spindle orientation and mammalian neurogenesis. *Neuron* *67*, 392–406.
- Goldman, R.D., Shumaker, D.K., Erdos, M.R., Eriksson, M., Goldman, A.E., Gordon, L.B., Gruenbaum, Y., Khuon, S., Mendez, M., Varga, R., and Collins, F.S. (2004). Accumulation of mutant lamin A causes progressive changes in nuclear architecture in Hutchinson-Gilford progeria syndrome. *Proc. Natl. Acad. Sci. USA* *101*, 8963–8968.
- Grima, J.C., Daigle, J.G., Arbez, N., Cunningham, K.C., Zhang, K., Ochaba, J., Geater, C., Morozko, E., Stocksdale, J., Glatzer, J.C., et al. (2017). Mutant Huntingtin Disrupts the Nuclear Pore Complex. *Neuron* *94*, 93–107.e6.
- Hickey, M., and Chesseelet, M. (2003). Apoptosis in Huntington's disease. *Prog. Neuropsychopharmacol. Biol. Psych.* *27*, 255–265.
- Hodges, A., Strand, A.D., Aragaki, A.K., Kuhn, A., Sengstag, T., Hughes, G., Elliston, L.A., Hartog, C., Goldstein, D.R., Thu, D., et al. (2006). Regional and cellular gene expression changes in human Huntington's disease brain. *Hum. Mol. Genet.* *15*, 965–977.
- Hodgson, J.G., Agopyan, N., Gutekunst, C.A., Leavitt, B.R., LePiane, F., Singaraja, R., Smith, D.J., Bissada, N., McCutcheon, K., Nasir, J., et al. (1999). A YAC mouse model for Huntington's disease with full-length mutant huntingtin, cytoplasmic toxicity, and selective striatal neurodegeneration. *Neuron* *23*, 181–192.
- Ippolito, D.M., and Eroglu, C. (2010). Quantifying synapses: an immunocytochemistry-based assay to quantify synapse number. *J. Vis. Exp.* *45*, 2270.
- Khakh, B.S. (2019). Astrocyte-Neuron Interactions in the Striatum: Insights on Identity, Form, and Function. *Trends Neurosci.* *42*, 617–630.
- Kravitz, A.V., Freeze, B.S., Parker, P.R., Kay, K., Thwin, M.T., Deisseroth, K., and Kreitzer, A.C. (2010). Regulation of parkinsonian motor behaviours by optogenetic control of basal ganglia circuitry. *Nature* *466*, 622–626.
- Kutscher, L.M., and Shaham, S. (2017). Non-apoptotic cell death in animal development. *Cell Death Differ.* *24*, 1326–1336.
- Langfelder, P., Cantle, J.P., Chatzopoulou, D., Wang, N., Gao, F., Al-Ramahi, I., Lu, X.H., Ramos, E.M., El-Zein, K., Zhao, Y., et al. (2016). Integrated genomics and proteomics define huntingtin CAG length-dependent networks in mice. *Nat. Neurosci.* *19*, 623–633.
- Leavitt, B.R., van Raamsdonk, J.M., Shehadeh, J., Fernandes, H., Murphy, Z., Graham, R.K., Wellington, C.L., Raymond, L.A., and Hayden, M.R. (2006). Wild-type huntingtin protects neurons from excitotoxicity. *J. Neurochem.* *96*, 1121–1129.
- Li, Z., Wang, C., Wang, Z., Zhu, C., Li, J., Sha, T., Ma, L., Gao, C., Yang, Y., Sun, Y., et al. (2019). Allele-selective lowering of mutant HTT protein by HTT-LC3 linker compounds. *Nature* *575*, 203–209.
- Lobo, M.K., Karsten, S.L., Gray, M., Geschwind, D.H., and Yang, X.W. (2006). FACS-array profiling of striatal projection neuron subtypes in juvenile and adult mouse brains. *Nat. Neurosci.* *9*, 443–452.



- Luthi-Carter, R., Strand, A., Peters, N.L., Solano, S.M., Hollingsworth, Z.R., Menon, A.S., Frey, A.S., Spektor, B.S., Penney, E.B., Schilling, G., et al. (2000). Decreased expression of striatal signaling genes in a mouse model of Huntington's disease. *Hum. Mol. Genet.* *9*, 1259–1271.
- Macdonald, M., Ambrose, C., Duyao, M., Myers, R., Lin, C., Srinidhi, L., Barnes, G., Taylor, S., James, M., Groot, N., et al.; The Huntington's Disease Collaborative Research Group (1993). A novel gene containing a trinucleotide repeat that is expanded and unstable on Huntington's disease chromosomes. *Cell* *72*, 971–983.
- Mazarei, G., Neal, S.J., Becanovic, K., Luthi-Carter, R., Simpson, E.M., and Leavitt, B.R. (2010). Expression analysis of novel striatal-enriched genes in Huntington disease. *Hum. Mol. Genet.* *19*, 609–622.
- McBride, J.L., Pitzer, M.R., Boudreau, R.L., Dufour, B., Hobbs, T., Ojeda, S.R., and Davidson, B.L. (2011). Preclinical safety of RNAi-mediated HTT suppression in the rhesus macaque as a potential therapy for Huntington's disease. *Mol. Ther.* *19*, 2152–2162.
- McKinstry, S.U., Karadeniz, Y.B., Worthington, A.K., Hayrapetyan, V.Y., Ozlu, M.I., Serafin-Molina, K., Risher, W.C., Ustunkaya, T., Dragatsis, I., Zeitlin, S., et al. (2014). Huntingtin is required for normal excitatory synapse development in cortical and striatal circuits. *J. Neurosci.* *34*, 9455–9472.
- Mehler, M.F., Petronglo, J.R., Arteaga-Bracho, E.E., Gulino, M.E., Winchester, M.L., Pichamoorthy, N., Young, S.K., DeJesus, C.D., Ishtiaq, H., Gokhan, S., and Molero, A.E. (2019). Loss-of-huntingtin in medial and lateral ganglionic lineages differentially disrupts regional interneuron and projection neuron subtypes and promotes Huntington's disease-associated behavioral, cellular and pathological hallmarks. *J. Neurosci.* *39*, 1892–1909.
- Milnerwood, A.J., and Raymond, L.A. (2007). Corticostriatal synaptic function in mouse models of Huntington's disease: early effects of huntingtin repeat length and protein load. *J. Physiol.* *585*, 817–831.
- Nasir, J., Floresco, S.B., O'Kusky, J.R., Diewert, V.M., Richman, J.M., Zeisler, J., Borowski, A., Marth, J.D., Phillips, A.G., and Hayden, M.R. (1995). Targeted disruption of the Huntington's disease gene results in embryonic lethality and behavioral and morphological changes in heterozygotes. *Cell* *81*, 811–823.
- Pogorelov, V.M., Rodríguez, R.M., Insko, M.L., Caron, M.G., and Wetsel, W.C. (2005). Novelty seeking and stereotypic activation of behavior in mice with disruption of the *Dat1* gene. *Neuropsychopharmacology* *30*, 1818–1831.
- Reiner, A., Albin, R.L., Anderson, K.D., D'Amato, C.J., Penney, J.B., and Young, A.B. (1988). Differential loss of striatal projection neurons in Huntington disease. *Proc. Natl. Acad. Sci. USA* *85*, 5733–5737.
- Rodrigues, F.B., and Wild, E.J. (2018). Huntington's Disease Clinical Trials Corner: February 2018. *J. Huntingtons Dis.* *7*, 89–98.
- Roos, R.A., and Bots, G.T. (1983). Nuclear membrane indentations in Huntington's chorea. *J. Neurol. Sci.* *61*, 37–47.
- Rui, Y.N., Xu, Z., Patel, B., Chen, Z., Chen, D., Tito, A., David, G., Sun, Y., Stimming, E.F., Bellen, H.J., et al. (2015). Huntingtin functions as a scaffold for selective macroautophagy. *Nat. Cell Biol.* *17*, 262–275.
- Sapp, E., Kegel, K.B., Aronin, N., Hashikawa, T., Uchiyama, Y., Tohyama, K., Bhide, P.G., Vonsattel, J.P., and DiFiglia, M. (2001). Early and progressive accumulation of reactive microglia in the Huntington disease brain. *J. Neuropathol. Exp. Neurol.* *60*, 161–172.
- Schneider, C.A., Rasband, W.S., and Eliceiri, K.W. (2012). NIH Image to ImageJ: 25 years of image analysis. *Nat. Methods* *9*, 671–675.
- Seong, I.S., Woda, J.M., Song, J.J., Lloret, A., Abeyrathne, P.D., Woo, C.J., Gregory, G., Lee, J.M., Wheeler, V.C., Walz, T., et al. (2010). Huntingtin facilitates polycomb repressive complex 2. *Hum. Mol. Genet.* *19*, 573–583.
- Shimojo, M. (2008). Huntingtin regulates RE1-silencing transcription factor/neuron-restrictive silencer factor (REST/NRSF) nuclear trafficking indirectly through a complex with REST/NRSF-interacting LIM domain protein (RILP) and dynactin p150 Glued. *J. Biol. Chem.* *283*, 34880–34886.
- Smith, Y., Bevan, M.D., Shink, E., and Bolam, J.P. (1998). Microcircuitry of the direct and indirect pathways of the basal ganglia. *Neuroscience* *86*, 353–387.
- Stogsdill, J.A., Ramirez, J., Liu, D., Kim, Y.H., Baldwin, K.T., Enustun, E., Eijkeme, T., Ji, R.R., and Eroglu, C. (2017). Astrocytic neurotrophins control astrocyte morphogenesis and synaptogenesis. *Nature* *551*, 192–197.
- Sun, W., Cornwell, A., Li, J., Peng, S., Osorio, M.J., Aalling, N., Wang, S., Benraiss, A., Lou, N., Goldman, S.A., and Nedergaard, M. (2017). SOX9 Is an Astrocyte-Specific Nuclear Marker in the Adult Brain Outside the Neurogenic Regions. *J. Neurosci.* *37*, 4493–4507.
- Tong, Y., Ha, T.J., Liu, L., Nishimoto, A., Reiner, A., and Goldowitz, D. (2011). Spatial and temporal requirements for huntingtin (Htt) in neuronal migration and survival during brain development. *J. Neurosci.* *31*, 14794–14799.
- Unschuld, P.G., Joel, S.E., Liu, X., Shanahan, M., Margolis, R.L., Biglan, K.M., Bassett, S.S., Schretlen, D.J., Redgrave, G.W., van Zijl, P.C., et al. (2012). Impaired cortico-striatal functional connectivity in prodromal Huntington's Disease. *Neurosci. Lett.* *514*, 204–209.
- Vijayraghavan, S., Major, A.J., and Everling, S. (2017). Neuromodulation of Prefrontal Cortex in Non-Human Primates by Dopaminergic Receptors during Rule-Guided Flexible Behavior and Cognitive Control. *Front. Neural Circuits* *11*, 91.
- von Schimmelmann, M., Feinberg, P.A., Sullivan, J.M., Ku, S.M., Badimon, A., Duff, M.K., Wang, Z., Lachmann, A., Dewell, S., Ma'ayan, A., et al. (2016). Polycomb repressive complex 2 (PRC2) silences genes responsible for neurodegeneration. *Nat. Neurosci.* *19*, 1321–1330.
- Vonsattel, J.P., Myers, R.H., Stevens, T.J., Ferrante, R.J., Bird, E.D., and Richardson, E.P., Jr. (1985). Neuropathological classification of Huntington's disease. *J. Neuropathol. Exp. Neurol.* *44*, 559–577.
- Walker, F.O. (2007). Huntington's disease. *Lancet* *369*, 218–228.
- Wang, G., Liu, X., Gaertig, M.A., Li, S., and Li, X.J. (2016a). Ablation of huntingtin in adult neurons is nondeleterious but its depletion in young mice causes acute pancreatitis. *Proc. Natl. Acad. Sci. USA* *113*, 3359–3364.
- Wang, X., Bey, A.L., Katz, B.M., Badea, A., Kim, N., David, L.K., Duffney, L.J., Kumar, S., Mague, S.D., Hulbert, S.W., et al. (2016b). Altered mGluR5-Homer scaffolds and corticostriatal connectivity in a *Shank3* complete knockout model of autism. *Nat. Commun.* *7*, 11459.
- Wittmann, M., Queisser, G., Eder, A., Wiegert, J.S., Bengtson, C.P., Hellwig, A., Wittum, G., and Bading, H. (2009). Synaptic activity induces dramatic changes in the geometry of the cell nucleus: interplay between nuclear structure, histone H3 phosphorylation, and nuclear calcium signaling. *J. Neurosci.* *29*, 14687–14700.
- Zhai, W., Jeong, H., Cui, L., Krainc, D., and Tjian, R. (2005). In vitro analysis of huntingtin-mediated transcriptional repression reveals multiple transcription factor targets. *Cell* *123*, 1241–1253.
- Zhang, J., Zhang, L., Jiao, H., Zhang, Q., Zhang, D., Lou, D., Katz, J.L., and Xu, M. (2006). c-Fos facilitates the acquisition and extinction of cocaine-induced persistent changes. *J. Neurosci.* *26*, 13287–13296.

## STAR★METHODS

### KEY RESOURCES TABLE

| REAGENT or RESOURCE                                             | SOURCE                                                                                      | IDENTIFIER                                                                                                              |
|-----------------------------------------------------------------|---------------------------------------------------------------------------------------------|-------------------------------------------------------------------------------------------------------------------------|
| <b>Antibodies</b>                                               |                                                                                             |                                                                                                                         |
| Rabbit anti-RFP                                                 | Rockland Immunochemicals                                                                    | Cat#600-401-379; RRID: AB_2209751                                                                                       |
| Rat anti-DARPP-32                                               | R&D Systems                                                                                 | Cat#MAB4230; RRID: AB_2169021                                                                                           |
| Guinea pig anti-VGAT                                            | Synaptic Systems                                                                            | Cat#131004; RRID: AB_887873                                                                                             |
| Chicken anti-Iba-1                                              | Synaptic Systems                                                                            | Cat#234006; RRID: AB_2619949                                                                                            |
| Rabbit anti-TdTomato                                            | Kerafast                                                                                    | Cat#EST203; RRID: AB_2732803                                                                                            |
| Rabbit anti-LaminB1                                             | ProteinTech                                                                                 | Cat#12987-1-AP; RRID: AB_2136290                                                                                        |
| Rabbit anti-pENK                                                | ThermoFisher Scientific                                                                     | Cat#30928; RRID: AB_1958811                                                                                             |
| Rabbit anti-CTIP2                                               | Abcam                                                                                       | Cat# ab18465; RRID: AB_2064130                                                                                          |
| DAPI                                                            | ThermoFisher Scientific                                                                     | Cat#D1306; RRID: AB_2629482                                                                                             |
| Rabbit anti-Gephyrin                                            | Synaptic Systems                                                                            | Cat#147002; RRID: AB_2619838                                                                                            |
| Rat anti-CD68                                                   | BioLegend                                                                                   | Cat#137002; RRID: AB_2044004                                                                                            |
| <b>Critical Commercial Assays</b>                               |                                                                                             |                                                                                                                         |
| RNeasy Mini RNA Isolation Kit                                   | QIAGEN                                                                                      | 74134                                                                                                                   |
| High Capacity cDNA Reverse Transcription Kit                    | ThermoFisher Scientific                                                                     | 4368814                                                                                                                 |
| <b>Experimental Models: Organisms/Strains</b>                   |                                                                                             |                                                                                                                         |
| D1-Cre(Tg/0) Htt(f/+) RTM(f/+) DP-Control Mice                  | This Paper                                                                                  | N/A                                                                                                                     |
| D1-Cre(Tg/0) Htt(f/-) RTM(f/+) DP-cKO Mice                      | This Paper                                                                                  | N/A                                                                                                                     |
| A2A-Cre(Tg/0) Htt(f/+) RTM(f/+) IP-Control Mice                 | This Paper                                                                                  | N/A                                                                                                                     |
| A2A-Cre(Tg/0) Htt(f/-) RTM(f/+) IP-cKO Mice                     | This Paper                                                                                  | N/A                                                                                                                     |
| A2A-Cre(Tg/Tg) Mice                                             | Gift from Caron Laboratory, Duke University; originally a gift from Gerfen Laboratory, NIMH | MGI: 5051776                                                                                                            |
| D1-Cre(Tg/Tg) Mice                                              | Jackson Laboratory                                                                          | MGI: 3836633                                                                                                            |
| RTM(f/f) Mouse: Gt(ROSA)26Sor <sup>tm2(CAG-TdTomato)</sup> Fawa | Gift from Wang Laboratory, Duke University                                                  | MGI_ MGI: 5305341                                                                                                       |
| Htt(f/f) Mice: Htt <sup>tm2Szi</sup>                            | Gift from Zeitlin Laboratory, University of Virginia (Dragatsis et al., 2000).              | MGI: 2177755                                                                                                            |
| <b>Oligonucleotides</b>                                         |                                                                                             |                                                                                                                         |
| Htt Forward Primer: CAGGTCGGCAGAGGAAC                           | This Paper                                                                                  | N/A                                                                                                                     |
| Htt Reverse Primer: CATAGCGATGCCCAAGAGTT                        | This Paper                                                                                  | N/A                                                                                                                     |
| pENK Forward Primer: GTTGTCTCCCGTCCCAAGTA                       | This Paper                                                                                  | N/A                                                                                                                     |
| pENK Reverse Primer: GACAGCAGCAAACAGGATGA                       | This Paper                                                                                  | N/A                                                                                                                     |
| Tac1 Forward Primer: TCGATGCCAACGATGATCTA                       | This Paper                                                                                  | N/A                                                                                                                     |
| Tac1 Reverse Primer: AGCCTTTAACAGGGCCACTT                       | This Paper                                                                                  | N/A                                                                                                                     |
| DARPP-32 Forward Primer: CCCAAAGTCGAAGAGACCCA                   | This Paper                                                                                  | N/A                                                                                                                     |
| DARPP-32 Reverse Primer: CCGAAGCTCCCCTAACTCATC                  | This Paper                                                                                  | N/A                                                                                                                     |
| <b>Software and Algorithms</b>                                  |                                                                                             |                                                                                                                         |
| Statistica                                                      | StatSoft                                                                                    | <a href="http://www.statsoft.com/Products/STATISTICA-Features">http://www.statsoft.com/Products/STATISTICA-Features</a> |
| Prism7                                                          | GraphPad                                                                                    | <a href="https://www.graphpad.com/scientific-software/prism/">https://www.graphpad.com/scientific-software/prism/</a>   |
| Imaris 9.0.0                                                    | Oxford Instruments                                                                          | <a href="https://imaris.oxinst.com/">https://imaris.oxinst.com/</a>                                                     |
| ImageJ                                                          | Schneider et al., 2012                                                                      | <a href="https://imagej.nih.gov/ij/">https://imagej.nih.gov/ij/</a>                                                     |

## LEAD CONTACT AND MATERIALS AVAILABILITY

Further information and requests for resources and reagents should be directed to and will be fulfilled by the Lead Contact, Dr. Cagla Eroglu ([cagla.eroglu@duke.edu](mailto:cagla.eroglu@duke.edu)). This study did not generate new unique reagents. All stable reagents generated in this study are available from the Lead Contact with a completed Materials Transfer Agreement.

## EXPERIMENTAL MODEL AND SUBJECT DETAILS

### In Vivo Experiments

To conditionally inactivate the *Huntingtin* (*Htt*) gene, we used previously described alleles of *Htt*: a floxed allele *Htt*<sup>tm2Szi</sup> (hereafter will be referred to as *Htt*<sup>fllox</sup>,) and a null allele (*Htt*<sup>-</sup>) (Dragatsis et al., 2000). To conditionally silence *Htt* in IP-SPNs, we utilized the Adenosine A2a receptor (*Adora2a*) Cre mouse line (hereafter, *A2A-Cre*<sup>(Tg/Tg)</sup> mice) developed by Nathaniel Heintz and Charles Gerfen (a kind gift from Dr. Marc Caron of Duke University). We chose this Cre line because it has been shown to successfully induce recombination specifically in IP-SPNs, and it avoids the wider expression profile of Cre lines that are based on the D2 receptor promoter (Gerfen et al., 2013). To identify Cre-expressing cells, we crossed the *Htt*<sup>fllox</sup> mice to the *Gt(ROSA)26Sor*<sup>tm2(CAG-TdTomato)<sup>Fawa</sup> mouse line (a kind gift from Dr. Fan Wang of Duke University) that expresses TdTomato upon Cre recombination (hereafter, *TdTomato*<sup>fllox</sup>). Experimental breeding pairs were as follows: *Htt*<sup>(+/-);A2A-cre</sup>(Tg/Tg) × *Htt*<sup>(fllox/fllox);TdTomato</sup>(fllox/fllox). Control mice were *Htt*<sup>(fllox/+);A2A-Cre</sup>(Tg/0);*TdTomato*<sup>(fllox/0)</sup>, and IP-SPN *Htt* conditional deletion mice (IP-cKOs) were *Htt*<sup>(fllox/-);A2A-Cre</sup>(Tg/0);*TdTomato*<sup>(fllox/0)</sup>. To conditionally silence *Htt* in the DP-SPNs, we utilized the Dopamine Receptor *Drd1-Cre* mouse line (hereafter, *D1-Cre*<sup>(Tg/Tg)</sup> mice). This Cre mouse line has been successfully used to recombine alleles in DP-SPNs (Gerfen et al., 2013). Experimental breeding pairs were as follows: *Htt*<sup>(+/-);D1-cre</sup>(Tg/0) × *Htt*<sup>(fllox/fllox);TdTomato</sup>(fllox/fllox). Control mice were *Htt*<sup>(fllox/+);D1-Cre</sup>(Tg/0);*TdTomato*<sup>(fllox/0)</sup>, and DP-SPN conditional deletion mice (DP-cKOs) were *Htt*<sup>(fllox/-);D1-Cre</sup>(Tg/0);*TdTomato*<sup>(fllox/0)</sup>. All the mice used (IP-Control, IP-cKO, DP-Control, and DP-cKO) have a mixed C57Bl6/129 background. The age of the mice used for each experiment is reported in the Results section and related figure captions. Mice of both sexes were utilized for all experiments.</sup>

All experiments involving mice were conducted in accordance with the guidelines set forth by the National Institute of Health's Guide for the Care and Use of Laboratory Animals. All protocols were approved in advance of their implementation by Duke University's Institutional Animal Care and Use Committee (Assurance number A3195-01). Mice were group-housed (N = 2-5 mice per cage) in standard housing conditions with a 12-hour light/dark cycle. All efforts were made to minimize distress and suffering endured by the mice during the procedures performed for this study. For tissue collection, mice were deeply anesthetized with 200 mg/kg Avertin and after brain death was confirmed, were intracardially perfused with Tris-Buffered Saline (TBS, 25 mM Tris-base, 135 mM NaCl, 3 mM KCl, pH 7.6) supplemented with 7.5 μM heparin, followed with 4% paraformaldehyde (PFA) in TBS.

For viral injections, mice were anesthetized with 3L/min Isoflurane and small craniotomies were made over the injection sites. 0.4 μL of virus was delivered unilaterally to dorsolateral striatum via a Nanoject II (Drummond Scientific) at a rate of 0.1 μL/min. The injection pipette was held in place for 10 minutes following injection and then slowly removed. Mice were closely monitored post-operatively and were allowed ~3 weeks recovery after viral injection before additional experiments were performed.

## METHOD DETAILS

### Flow Cytometry and qRT-PCR

TdTomato<sup>+</sup> and TdTomato<sup>-</sup> cells were flow sorted from 2-m/o IP-Control, IP-cKO, DP-Control, and DP-cKO mice, similar to previously described methods (Stogsdill et al., 2017). Briefly, animals were anesthetized by intraperitoneal injection of 200 mg/kg avertin, decapitated after brain death, and brains resected in DPBS (Thermo-Fisher). Striata were quickly microdissected under a dissection scope and chopped into < 1mm<sup>3</sup> chunks. Striata were digested with papain (Worthington; 7.5U/mL) with DNaseI diluted in DPBS for 45min at 33-34°C. Digested tissues were triturated in 5 mL DPBS with a P1000 pipette and centrifuged at 900 g for 5 minutes at room temperature. The remaining pellet was triturated in 8 mL lo-ovomucoid (Worthington) with a P1000 pipette to create a single-cell suspension and then centrifuged at 1100 g for 10 min at room temperature. The pelleted cells were resuspended in 2-4 mL panning buffer (DPBS with BSA and insulin) and passed through a 40 μm filter to strain out large clumps of cells. Cells were kept on ice until sorting. Cell sorting was performed on a BD Diva sorter (BD Biosciences) to separate TdTomato<sup>+</sup> and TdTomato<sup>-</sup> cells. Cells were sorted directly into RNeasy Mini Kit Lysis Buffer RLT (QIAGEN).

Total RNA was isolated from flow cytometry-sorted TdTomato<sup>+</sup> and TdTomato<sup>-</sup> cells. The RNeasy Mini Kit (QIAGEN) was used to extract RNA, following manufacturer instructions. RNA concentration was estimated using a NanoDrop 2000 (Thermo Scientific). Extracted RNA was reverse transcribed with the High Capacity cDNA Synthesis Kit (Applied Biosciences) to create cDNA per manufacturer's protocol. qPCR was performed with equal volumes of cDNA from IP-Control, IP-cKO, DP-Control, and DP-cKO samples. cDNA from each sample was mixed with Power SYBR Green PCR Master Mix (Applied Biosystems), and exon-skipping primers (see the complete list of primers below) from IDT-DNA. All samples were run in triplicate on the ABI 7300 cycycler (Applied Biosystems) for each primer set. A no-cDNA sample (water only) served as a negative control. To ensure the integrity and specificity of each primer

set, an  $R^2$  correlation based upon a serial dilution (1:1, 1:10 and 1:100) of the pooled cDNA samples was generated for each set. For all primer sets used, the  $R^2$  value fell between 0.90 and 0.99. qPCR products were also run on a 2% TBE + ethidium bromide gel and all produced a single band of the predicted sequence size. After running the qPCR reaction, the average transcript Ct value obtained for each sample was normalized to the Ct of its own GAPDH level ( $\Delta$ Ct). For comparison of transcript expression between genotypes,  $\Delta$ Ct values were normalized to the relevant control levels (which was set to 1). Unpaired two-tailed t testing was then used to compare transcript expression between the genotypes.

Sequences of Primers Used for qRT-PCR (5' - > 3'):

*HTT Forward*: CAGGTCCGGCAGAGGAAC

*HTT Reverse*: CATAGCGATGCCCAAGAGTT

*pENK Forward*: GTTGTCTCCCGTTCCAGTA

*pENK Reverse*: GACAGCAGCAAACAGGATGA

*Tac1 Forward*: TCGATGCCAACGATGATCTA

*Tac1 Reverse*: AGCCTTTAACAGGGCCACTT

*DARPP-32 Forward*: CCCAAAGTCAAGAGACCCA

*DARPP-32 Reverse*: CCGAAGCTCCCCTAACTCATC

### Western Blot

Brains from 2-m/o IP-Control, IP-cKO, DP-Control, and DP-cKO mice were isolated after mice were anesthetized with 200 mg/kg Avertin and perfused intracardially with Tris-Buffered Saline (TBS, 25 mM Tris-base, 135 mM NaCl, 3 mM KCl, pH 7.6) supplemented with 7.5  $\mu$ M heparin. The cortex and striata of each brain were dissected and flash-frozen in liquid nitrogen. Frozen tissue was homogenized in RIPA buffer (Thermo-Fisher) with cOMplete protease inhibitor (Roche) + 2mM sodium orthovanadate + 10 mM sodium fluoride. Tissue was dounced 10-15 times on ice and the liquid homogenate was transferred to a chilled Eppendorf tube. The homogenate was rocked at 4°C for 20 minutes, then centrifuged at 15,000 rpm for 10 minutes at 4°C. The resulting supernatant was decanted and protein concentration was measured using the micro BCA protein assay kit according to manufacturer's protocol (Thermo-Fisher). The samples were then mixed with 2xLaemmli buffer + beta-mercaptoethanol (1:200) and were warmed at 70°C for 10 minutes. For Western Blotting for HTT protein, 50  $\mu$ g of total protein/well was loaded into 4%–15% stain-free polyacrylamide gels (BioRad) and resolved by SDS-PAGE. A BioRad Imager was then used to activate the gel and total adjusted protein expression per lane was measured using ImageLab Software (BioRad). Protein was then transferred onto an Immobilon-FL PVDF membrane (Millipore) which had been activated by a 5-minute methanol wash. Blots were rinsed in PBS containing 0.01% Tween-20 and then blocked in 50% Odyssey blocking buffer (Li-Cor) in PBS for one hour at room temperature before incubating with primary antibody (1:1000 mouse anti-HTT, Millipore 2166) in blocking buffer overnight at 4°C. Fluorescence-conjugated secondary antibodies (Li-Cor) were diluted (1:5000) in 50% Odyssey blocking buffer (Li-Cor) in PBS and western blots were incubated with secondary antibodies at room temperature for 2 hours. Detection was performed using the Li-Cor Odyssey System. Tissue from 3–4 mice per genotype was used. The intensities of protein bands were quantified using ImageStudioLite Software. HTT band intensities in each lane were normalized to the total adjusted protein per lane. The relative intensities of cKO lysates were normalized to the relevant control lysates. Statistical differences in protein levels between genotypes were assessed using unpaired two-way t testing.

### Immunohistochemistry

For immunohistochemical studies (IHC), mice were perfused intracardially with Tris-Buffered Saline (TBS, 25 mM Tris-base, 135 mM NaCl, 3 mM KCl, pH 7.6) supplemented with 7.5  $\mu$ M heparin, followed with 4% paraformaldehyde (PFA) in TBS. The brains were dissected and fixed overnight in 4% PFA in TBS at 4°C. The following day, brains were rinsed 3 times with TBS and then cryoprotected with 30% sucrose in TBS at 4°C. After cryoprotection, brains were embedded in a 2:1 mixture of 30% sucrose in TBS:OCT (Tissue-Tek). Brains were cryosectioned using a Leica CM3050S cryostat.

The following procedure was utilized for IHC studies using anti-RFP, anti-CTIP, anti-pENK, anti-DARPP-32, anti-VGAT, anti-Gephyrin, anti-CD68, anti-TdTomato, anti-IBA-1, anti-SOX9, and anti-LaminB1. Free-floating sections were washed 3 times for 10 minutes with TBS with 0.2% Triton X-100 (Roche) and blocked in 10% Normal Goat Serum (NGS; Jackson ImmunoResearch) with 0.2% Triton X-100 in TBS for 1 hour at room temperature. Primary antibodies (see table below) were diluted in 5% NGS in TBS with 0.2% Triton X-100. Sections were incubated overnight at 4°C with primary antibodies and washed three times for 10 minutes with TBS the following morning. Secondary Alexa-fluorophore conjugated antibodies (Invitrogen) were diluted (1:300) in 5% NGS in TBS with 0.2% Triton X-100, and sections were incubated with secondary antibodies for 2 hours at room temperature, protected from light. After incubation, sections were washed three times for 10 minutes in TBS and mounted with Vectashield with DAPI (Vector Laboratories). Images were acquired on confocal laser-scanning microscopes (Leica SP8, Zeiss LSM 710, or Olympus Fluoview 3000). The microscope used for each experiment was selected based on experimental need and only one microscope was used for each experiment to ensure consistency.

## Primary Antibodies used for Immunohistochemistry

| Antibody Name        | Vendor/Catalog Number                | Dilution for IHC |
|----------------------|--------------------------------------|------------------|
| Rabbit anti-RFP      | Rockland Immunochemicals 600-401-379 | 1:2000           |
| Rat anti-DARPP-32    | R&D MAB4320                          | 1:1000           |
| Guinea pig anti-VGAT | Synaptic Systems 131004              | 1:1000           |
| Rabbit anti-Gephyrin | Synaptic Systems 147002              | 1:1000           |
| Rat anti-CD68        | BioLegend 137002                     | 1:1000           |
| Chicken anti-IBA1    | Synaptic Systems 234006              | 1:1000           |
| Rabbit anti-TdTomato | Kerafast EST203                      | 1:1500           |
| Rabbit anti-LaminB1  | ProteinTech 12987-1-AP               | 1:1000           |
| DAPI                 | ThermoFisher D1306                   | 1:10,000         |
| Rabbit anti-pENK     | Invitrogen 30928                     | 1:1000           |
| Rat anti-CTIP2       | Abcam ab18465                        | 1:1000           |

## Cell Number Quantifications

**SPN Number Quantification:** Following 4% PFA perfusion and sucrose cryoprotection as described above, brains were cryosectioned into 20  $\mu\text{m}$  coronal slices beginning at the anterior striatum and proceeding through the posterior striatum (Bregma 1.345mm to  $-0.755\text{mm}$ ). Sections were stained with rabbit anti-RFP and rat-DARPP-32, as described in detail above. For each mouse, three brain sections were chosen for analysis: one containing the anterior striatum ( $\sim$ Bregma 1mm), one containing the medial striatum ( $\sim$ Bregma 0.0mm), and one containing the posterior striatum ( $\sim$ Bregma  $-0.5\text{mm}$ ). For each of the three selected brain sections, six images were acquired at various preselected points along the dorsal-ventral axis of the striatum. The dorsal striatum was identified by its anatomical relationship to the corpus callosum in the coronal plane. Once the dorsal striatum was identified, the coordinates of the Zeiss LSM-710 automated microscope stage were set to  $x = 0$  and  $y = 0$  and an image was acquired. The automated stage was then moved 200  $\mu\text{m}$  in the x-direction with no y-displacement to take a second image in the dorsal region. For images of the medial striatum, the stage was moved ventrally (450  $\mu\text{m}$  in the y-direction) and two images were acquired with an x-displacement of 200  $\mu\text{m}$ . For images of the ventral striatum, a y-displacement of 250  $\mu\text{m}$  from the medial striatum was used and a 150  $\mu\text{m}$  x-displacement was employed between images. Z stack images spanning 8.64  $\mu\text{m}$  were acquired using the 20x dry objective (1.08  $\mu\text{m}$  between optical slices, 8 optical slices total). Maximum intensity Z-projections were created using the Max-Z Projection plugin in ImageJ. DARPP-32 fluorescence was used to identify SPNs. Cre-expressing SPNs were identified by expression of TdTomato. Comprehensive counting of all TdTomato<sup>+</sup> and DARPP-32<sup>+</sup> SPNs was performed on all acquired images using the Cell Counter plugin in ImageJ. The experimenter was blind to genotype during image acquisition as well as during cell counting. Three animals/genotype/age were analyzed. Data was analyzed with a one-way ANOVA followed by Sidak's multiple comparisons test.

**Cortical Neuron Quantification:** 20  $\mu\text{m}$  sagittal slices containing the M1 motor cortex of 2- and 10-m/o DP-Control and DP-cKO were stained for TdTomato (RFP) and DARPP-32, as described in detail above. The 20x dry objective of an Olympus FluoView 3000 confocal microscope was used to acquire and stitch three tile scan images per mouse of the M1 motor cortex spanning from the pia to the dorsal striatum. ImageJ was used to create maximum z-projections of the stitched tile scans. ROIs of Layer 2/3, Layer 4, and Layer 5&6 were created for each image, and the area of each ROI was recorded. The ImageJ Analyze Particles Plugin was used to quantify the number of TdTomato<sup>+</sup> and NeuN<sup>+</sup> in each image, and the accuracy of this method was verified by hand-counting using the Cell Counter Plugin. The experimenter was blind to genotype during image acquisition as well as during cell counting. One-way ANOVA with Sidak's multiple comparisons test was used to test for statistical differences between the proportion of TdTomato<sup>+</sup>/NeuN<sup>+</sup> cortical neurons between genotypes.

**Quantification of Astrocytes and Microglia Numbers:** Sections containing the striatum were stained for either IBA-1 or SOX9 (see Primary Antibodies Table above). Confocal z stacks of the dorsal striatum were acquired using the 20x dry objective on an Olympus FluoView 3000 microscope. A minimum of four images were acquired per mouse, and at least three mice were analyzed per genotype. All cell bodies of microglia and astrocytes were counted in each image using ImageJ's Cell Counter Plugin. The experimenter was blind to genotype during image acquisition as well as during counting. Unpaired two-way t testing was used to determine statistical difference between genotypes.

## Fluorescence Intensity Quantifications

For each experiment involving quantification of immunohistochemical fluorescent intensity, confocal z stacks of the striatum were acquired using either the 20x dry or the 60x oil objective on an Olympus FluoView 3000 microscope holding gain and laser power constant across all images. Max-Z projections were created using ImageJ and ROIs were drawn around cells. The area and

integrated density of the fluorescent signal within each ROI was measured and recorded, with experimenter blinded to genotype. Fluorescence intensity was calculated as integrated density/ROI area. Statistical analysis was conducted using one-way ANOVA with Sidak's multiple comparisons test on the average of all integrated density/ROI area measurements per image.

### Nuclear Morphological Analysis

20  $\mu\text{m}$  sagittal sections containing the striatum were stained for RFP, LaminB1, and DAPI (see primary antibody table above). Confocal z stacks of the striatum were acquired using the 60x oil objective on an Olympus FluoView 3000 microscope, with 3 images acquired per mouse brain. An experimenter blind to genotype analyzed the nuclei of all RFP+ SPNs within an image and identified each nucleus as either "normal" or "abnormal." Nuclei were recorded as "abnormal" if they contained at least one or more of the following features: a single large membrane invagination, a "hole" within the DAPI staining, or significant membrane rippling/jaggedness. The TdTomato- nuclei (IP-SPNs of DP animals, and DP-SPNs of IP animals) were also assessed in the same fashion. The proportion of abnormal nuclei was computed, and genotype differences were determined after unblinding using a one-way ANOVA with Sidak's test for multiple comparisons. At least 3 2-m/o mice were used per genotype.

### Behavior

**Open Field Test:** Mice were placed individually into the Open Field arena (AccuScan Instruments, Columbus, OH) and spontaneous motor activity was monitored over 60 minutes as described (Pogorelov et al., 2005). Horizontal activity or locomotion was measured as the distance traveled and time spent moving within the entire open field. Time spent in the open field margins was also monitored. Stereotypical activity was measured as repetitive beam-breaks less than 1 s.

**Rotarod Test:** Balance and coordination were evaluated on the accelerating (4–40 rpm) rotarod (Med-Associates, St. Albans, VT) as described (Wang et al., 2016b). Mice were tested over 4 successive 5-minute trials which were separated by 30-minute inter-trial intervals. Trials were terminated at 300 s, or when the mouse fell from the rod. Latency to fall was recorded for each mouse.

### GABAergic Synapse Quantification

20  $\mu\text{m}$  sagittal brain sections were stained with pre- (VGAT) and post-synaptic (gephyrin) marker pairs adapted from the protocols described in Ippolito and Eroglu (2010) (3–4 animals/genotype). Sections were selected based on anatomical features to contain the brain region of interest (i.e., GPe or SNR). 5.1  $\mu\text{m}$ -thick confocal images (optical section depth 0.34  $\mu\text{m}$ , 15 sections/scan, imaged area/scan = 13514  $\mu\text{m}^2$ ) were acquired at 60x magnification on an Olympus FluoView 3000 microscope within the anatomical region of interest. Maximum projections of 3 consecutive optical sections (corresponding to 1.02  $\mu\text{m}$  total depth) were generated using ImageJ. The Puncta Analyzer Plugin (available upon request; c.eroglu@cellbio.duke.edu) for ImageJ was used to count the number of colocalized synaptic puncta. At least 5 maximum projections per brain, from 2–4 brain sections per animal, were analyzed using a Nested ANOVA. Rotation analysis was used for each GABAergic synapse quantification experiment to verify that colocalized puncta (i.e., synapses) were not due to random chance. For these analyses, the gephyrin channel for each image was rotated 90 degrees using ImageJ and then was re-merged with the non-rotated VGAT channel. The Puncta Analyzer Plugin was used to quantify the number of VGAT, gephyrin, and colocalized puncta of each image. Puncta numbers of the rotated images were normalized to puncta numbers of the original, non-rotated images. One-way ANOVA was used to assess differences between the number of puncta counted in the rotated versus the original images.

### Electrophysiology

**Miniature Inhibitory Postsynaptic Currents:** For whole-cell patch-clamp recordings, brains from mice (N = 3–5 per condition) were removed quickly into ice-cold solution bubbled with 95% O<sub>2</sub>–5% CO<sub>2</sub> containing the following (in mM): sucrose (194), NaCl (30), KCl (2.5), MgCl<sub>2</sub> (1), NaHCO<sub>3</sub> (26), NaH<sub>2</sub>PO<sub>4</sub> (1.2), and D-glucose (10). After 3–4 minutes the brains were blocked and sagittal slices were taken at 250  $\mu\text{m}$ . During the recovery period (30 minutes) the slices were kept at 35.5°C with oxygenated artificial cerebrospinal fluid (aCSF) solution containing the following (in mM): NaCl (124), KCl (2.5), CaCl<sub>2</sub> (2), MgCl<sub>2</sub> (1), NaHCO<sub>3</sub> (26), NaH<sub>2</sub>PO<sub>4</sub> (1.2), and D-glucose (10). Internal solution for the pipette (3–5 M $\Omega$ ) contained (in mM): CsCl (130), potassium gluconate (30), CaCl<sub>2</sub> (0.1), EGTA (1), HEPES (10), magnesium ATP (2), and sodium GTP (0.2) with pH adjusted to 7.2 with KOH and osmolarity set to 300 mosM. All recordings were performed with the MultiClamp 700B amplifier (Molecular Device). Signals were filtered at 10 kHz and digitized at 20 kHz with the Digidata 1440A digitizer (Molecular Device). During recording, slices were maintained under continuous perfusion of aCSF at 28–29°C with 2–3 mL/min flow rate. In the whole-cell configuration (series resistance < 20 M $\Omega$ ), we recorded miniature IPSCs (mIPSCs) on the cell bodies of GPe neurons with 1  $\mu\text{M}$  TTX, 50  $\mu\text{M}$  APV, and 50  $\mu\text{M}$  DNQX in the bath solution in voltage-clamp mode (cells held at –70 mV). The amplitudes and frequencies of mIPSCs were analyzed using peak detection software in pCLAMP10 (Molecular Devices).

**Optogenetics:** Ten 2-m/o mice were used in the optogenetic experiments (DP-Control, n = 5; DP-cKO, n = 5). Adeno-associated viral vectors were used for Cre-dependent expression of the excitatory channelrhodopsin (pAAV-EFla-DIO-hChR2(H134R)-EYFP, Duke Viral Core, titer > 1  $\times$  10<sup>12</sup> particles/mL). 0.4  $\mu\text{L}$  of virus was delivered unilaterally via a Nanoject II (Drummond Scientific) at a rate of 0.1  $\mu\text{L}/\text{min}$  to the following coordinates relative to Bregma: AP: + 0.4 mm, ML: - 2.0 mm, DV: 2.0 mm. Slices were generated for paired-pulse experiments ~3 weeks after viral injection. Slices were stimulated with 470-nm light generated from an LED

assembly (Thor Labs) focused through a  $\times 40$  objective (Olympus). During recordings, paired light flashes (1 ms) were delivered at 50, 100, and 150 ms interval with an LED current driver (Thor Labs). Power density was  $\sim 5$  mW/mm<sup>2</sup>.

### **Microglial Analysis using Imaris Software**

20  $\mu$ m sagittal brain sections containing the striatum of 10-m/o DP-Control and DP-cKO mice were stained for IBA-1 and CD68 (see primary antibodies table). Confocal z stacks of the dorsal striatum were acquired using the 60x oil objective on an Olympus FluoView 3000 microscope. Imaris Software 9.0.0 was used to create surface reconstructions of all whole, individual microglia within each image. A surface reconstruction was also generated for CD68 localized specifically within the microglial cell reconstruction. The average microglia volume and average CD68 volume per microglial cell were calculated per image and unpaired two-way t testing was used to query differences between genotypes.

### **QUANTIFICATION AND STATISTICAL ANALYSIS**

Statistical analyses of the quantified data were done using the appropriate statistical test for each kind of analyses. Details for each can be found above within the sections describing each individual method. The names of the tests and the number of mice used per analysis can also be found in the Results section and/or within the figure captions. Statistica (StatSoft, OK) and Prism7 (GraphPad Software) were used for all statistical analyses. Unless otherwise specifically stated, all data are expressed as mean  $\pm$  SEM and significance is defined as  $p < 0.05$ . The exact statistics and p values are given for each analysis within the text.

### **DATA AND CODE AVAILABILITY**

This study did not generate/analyze datasets or code.

**Cell Reports, Volume 30**

**Supplemental Information**

**Striatal Projection Neurons Require Huntingtin  
for Synaptic Connectivity and Survival**

**Caley J. Burrus, Spencer U. McKinstry, Namsoo Kim, M. Ilcim Ozlu, Aditya V. Santoki, Francia Y. Fang, Annie Ma, Yonca B. Karadeniz, Atesh K. Worthington, Ioannis Dragatsis, Scott Zeitlin, Henry H. Yin, and Cagla Eroglu**



**Figure S1**  
(Related to Figure 1)

**Burrus et al.**

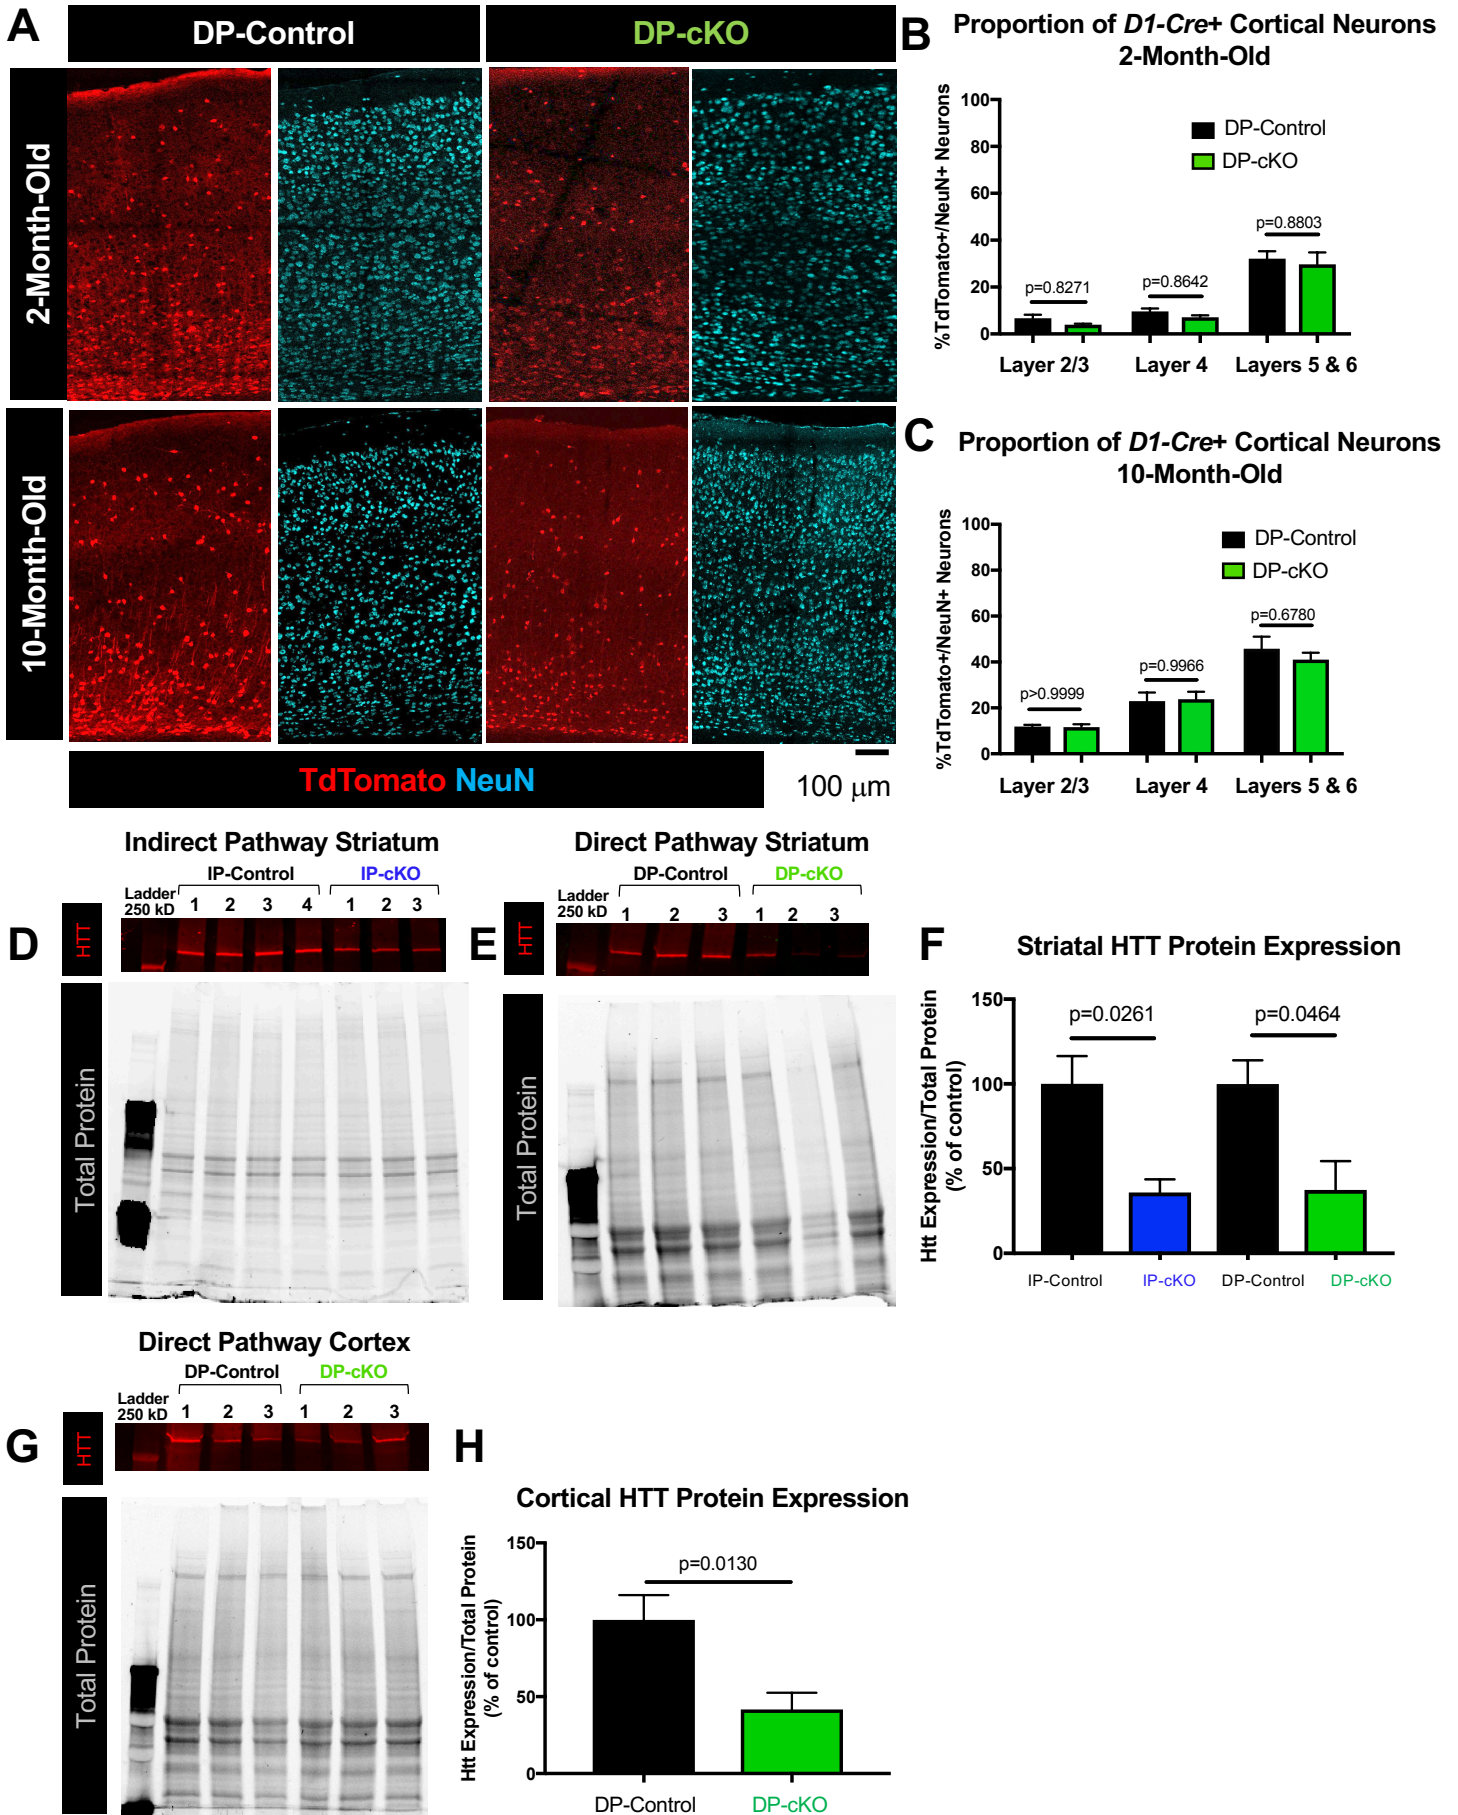

**Figure S1: *A2A-Cre* and *D1-Cre* drive significant reduction of HTT protein expression, and *D1-Cre* is expressed in a subset of cortical neurons (Related to Figure 1).**

- A. Representative images of 2- and 10-m/o DP-Control and DP-cKO M1 motor cortex stained for TdTomato (*D1-Cre*) and NeuN.
- B. Quantification of the percentage of NeuN+ cortical neurons expressing *D1-Cre* in 2-m/o mice (n=2-3 images per mouse, 3 mice/genotype, one-way ANOVA  $F(5,42)=25$ , Sidak's multiple comparisons test for within-region comparisons, p-values displayed on graph).
- C. Quantification of the percentage of NeuN+ cortical neurons expressing *D1-Cre* in 10-m/o mice (n=2-3 images per mouse, 3 mice/genotype, one-way ANOVA  $F(5,42)=19.51$ , Sidak's multiple comparisons test for within-region comparisons, p-values displayed on graph).
- D. Top: Western blot of HTT protein in lysates from adult IP-Control and IP-cKO striatum. Bottom: corresponding activated stain-free gel total protein loading control.
- E. Top: Western blot of HTT protein in lysates from adult DP-Control and DP-cKO striatum. Bottom: corresponding activated stain-free gel total protein loading control.
- F. Quantification of striatal HTT protein levels in cKOs compared to controls. Li-Cor fluorescence of each HTT band was normalized to total protein per lane, and relative HTT expression in cKOs was then normalized to their controls (unpaired two-way t-test, n=3-4 mice/genotype, IP-Control vs. IP-cKO:  $t=3.124$ ,  $df=5$ ,  $p=0.0261$ ; DP-Control vs. DP-cKO:  $t=2.85$ ,  $df=4$ ,  $p=0.0464$ ).
- G. Top: Representative Western blot of HTT protein in lysates from adult DP-Control and DP-cKO cortex. Bottom: corresponding activated stain-free gel total protein loading control.
- H. Quantification of cortical HTT protein levels in DP-cKOs compared to DP-Controls. Li-Cor fluorescence of each HTT band was normalized to total protein per lane, and relative HTT expression in DP-cKOs was then normalized to DP-Controls (unpaired two-way t-test, n=3 mice/genotype, samples run in duplicate,  $t=3.017$ ,  $df=10$ ,  $p=0.0130$ ).

**Figure S2**  
(Related to Figure 1)

**Burrus et al.**

**Indirect Pathway**

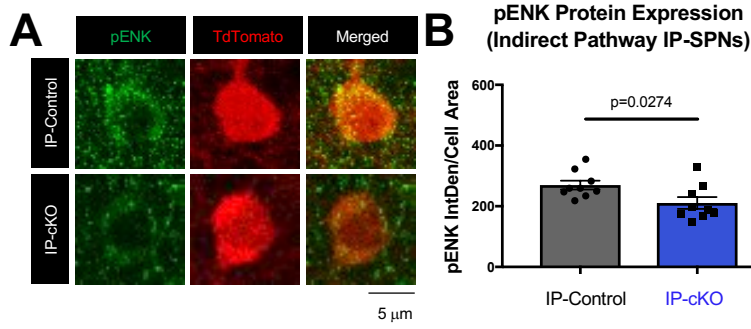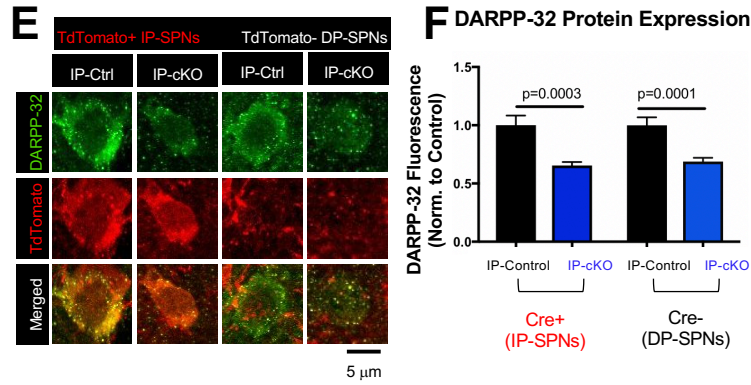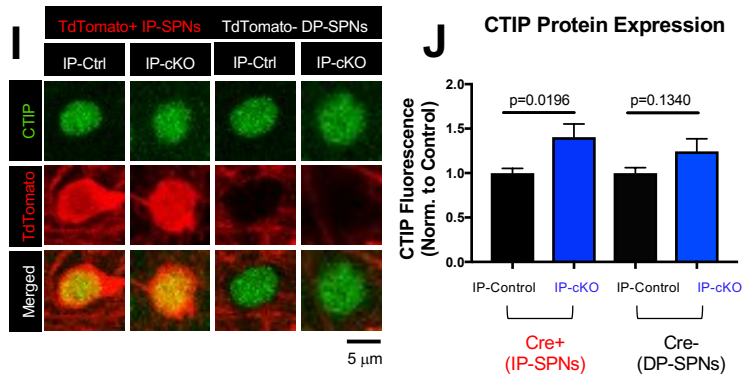

**Direct Pathway**

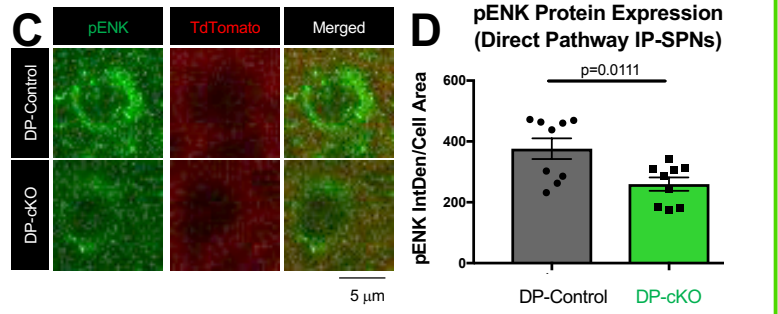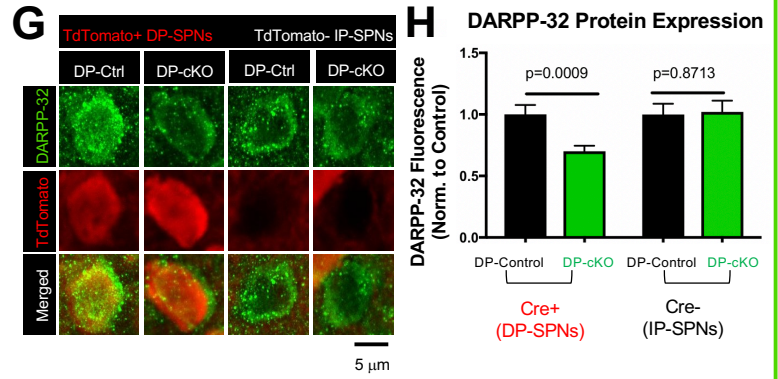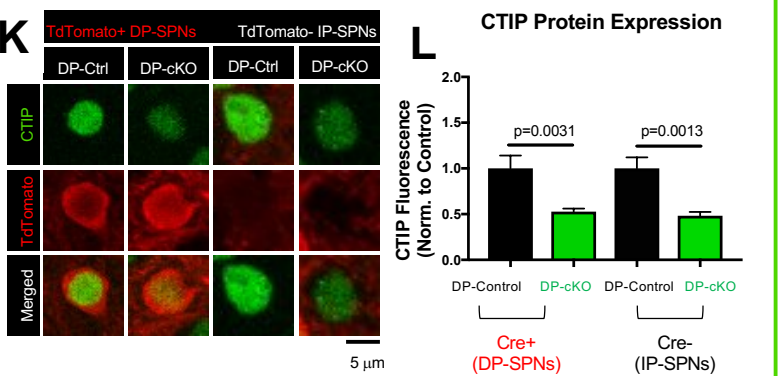

**Figure S2: *Htt* cKO alters SPN gene expression (Related to Figure 1).**

- A. Representative images of pENK (green) expression within IP-SPNs (TdTomato+) from the dorsal striatum of 2-m/o IP-Control and IP-cKO mice.
- B. pENK fluorescence intensity per cell was reduced in IP-cKO IP-SPNs compared to IP-Controls (n=3 mice/genotype, 3 images/mouse, unpaired two-way t-test  $t=2.428$ ,  $df=16$ ,  $p=0.0274$ ).
- C. Representative images of pENK expression (green) within IP-SPNs (TdTomato-) from the dorsal striatum of 2-m/o DP-Control and DP-cKO mice.
- D. pENK fluorescence intensity was reduced in DP-cKO IP-SPNs compared to DP-Controls (n=3 mice/genotype, 3 images/mouse, unpaired two-way t-test  $t=2.872$ ,  $df=16$ ,  $p=0.0111$ ).
- E. Representative images of DARPP-32 (green) expression within Cre+ and Cre- SPNs from the dorsal striatum of 2-m/o IP-Control and IP-cKO mice.
- F. DARPP-32 fluorescence intensity per SPN was reduced in both IP-cKO Cre+ IP-SPNs (n>22 cells per genotype, unpaired two-way t-test,  $t=3.91$ ,  $df=54$ ,  $p=0.0003$ ) and neighboring Cre- DP-SPNs (n>22 cells per genotype, unpaired two-way t-test,  $t=4.214$ ,  $df=44$ ,  $p=0.0001$ ) compared to IP-Controls.
- G. Representative images of DARPP-32 (green) expression within Cre+ and Cre- SPNs from the dorsal striatum of 2-m/o DP-Control and DP-cKO mice.
- H. DARPP-32 fluorescence intensity per SPN was reduced in DP-cKO Cre+ DP-SPNs versus DP-Control DP-SPNs (n>19 cells per condition, unpaired two-way t-test,  $t=3.574$ ,  $df=44$ ,  $p=0.0009$ ), but not in DP-cKO Cre- IP-SPNs compared to DP-Control IP-SPNs (n>14 cells per genotype, unpaired two-way t-test,  $t=0.1633$ ,  $df=31$ ,  $p=0.8713$ ).
- I. Representative images of CTIP (green) expression within Cre+ and Cre- SPNs from the dorsal striatum of 2-m/o IP-Control and IP-cKO mice.
- J. CTIP fluorescence intensity per SPN was increased in IP-cKO Cre+ IP-SPNs compared to IP-Control IP-SPNs, but was not significantly different in IP-cKO Cre- DP-SPNs compared to IP-Control DP-SPNs (n=3 mice/genotype, 3 images/mouse, one-way ANOVA with Sidak's multiple comparisons test,  $F(3,32)=3.266$ , p-values displayed above).
- K. Representative images of CTIP (green) expression within Cre+ and Cre- SPNs from the dorsal striatum of 2-m/o DP-Control and DP-cKO mice.
- L. CTIP fluorescence intensity per SPN was significantly reduced in both DP-cKO Cre+ DP-SPNs compared to DP-Control DP-SPNs and DP-cKO Cre- IP-SPNs compared to DP-Control IP-SPNs (n=3 mice/genotype, 3 images/mouse, one-way ANOVA with Sidak's multiple comparisons test,  $F(3,32)=8.783$ , p-values displayed above.)

## Figure S3 (Related to Figure 3)

Burrus *et al.*

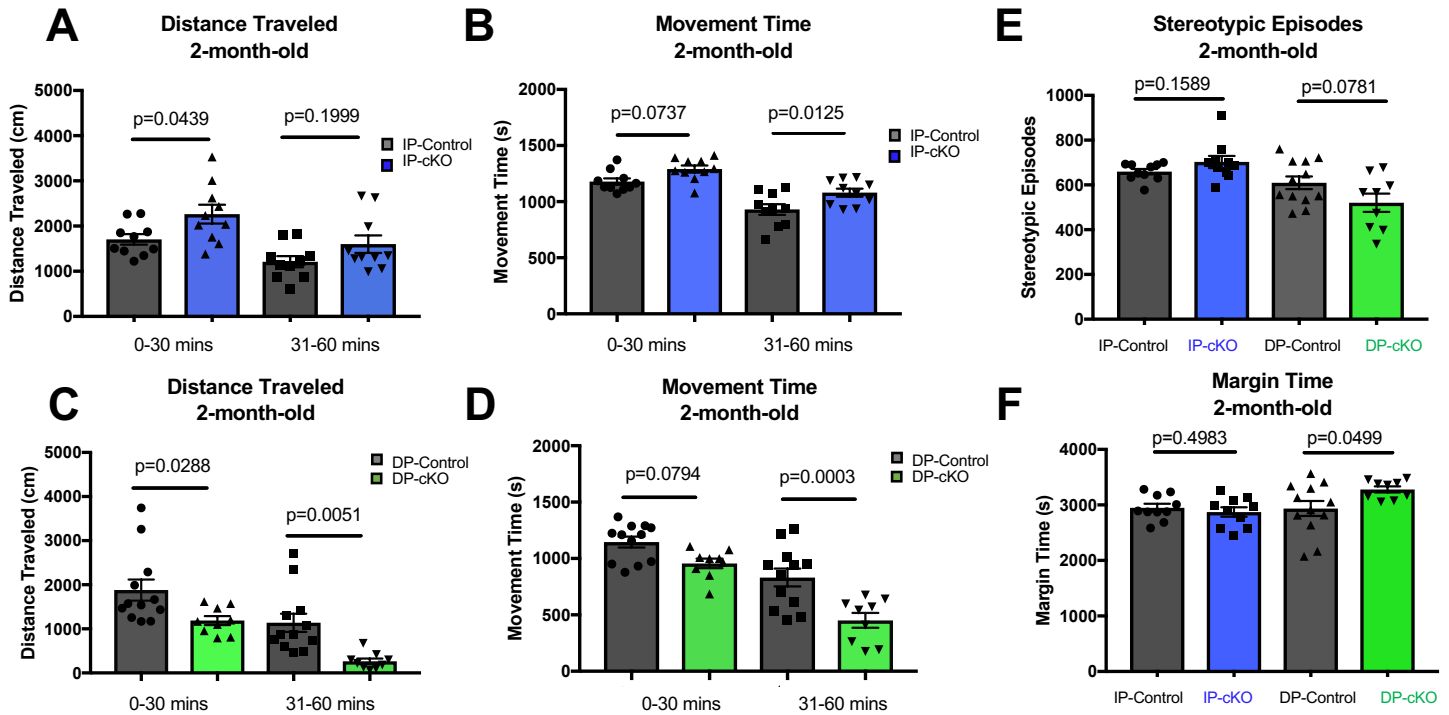

**Figure S3: Stereotypic episodes and margin time analysis of 2-m/o mice (Related to Figure 3)**

A. 2-m/o IP-cKOs traveled significantly farther than IP-Controls during the first 30 minutes of the Open Field Test (OFT), and displayed a trending increase in distance traveled during the last 30 minutes (one-way ANOVA  $F(3,36)=6.902$ ,  $p=0.0009$ , Sidak's multiple comparisons test p-values displayed on graph).

B. 2-m/o IP-cKOs displayed a trending increase in movement time compared to IP-Controls during the first 30 minutes of the OFT, and moved significantly more than controls during the last 30 minutes (one-way ANOVA  $F(3,36)=17.49$ ,  $p<0.0001$ , Sidak's multiple comparisons test p-values displayed on graph).

C. 2-m/o DP-cKOs traveled a significantly shorter distance than DP-Controls during the first 30 minutes as well as the last 30 minutes of the OFT, although this difference was more pronounced during the last 30 minutes (one-way ANOVA  $F(3,38)=11.93$ ,  $p<0.0001$ , Sidak's multiple comparisons test p-values displayed on graph).

D. 2-m/o DP-cKOs had a trending decrease in movement time compared to DP-Controls during the first 30 minutes of the OFT, and moved significantly less than controls during the last 30 minutes of the OFT (one-way ANOVA  $F(3,38)=20.77$ ,  $p<0.0001$ , Sidak's multiple comparisons test p-values displayed on graph).

E. Neither 2-m/o IP-cKOs nor DP-cKOs differed significantly from relevant controls on OFT stereotypic episodes, although DP-cKOs displayed a trending reduction in the number of episodes performed (IP-Control vs IP-cKO:  $n=10$  animals/genotype, unpaired two-way t-test  $t=1.47$ ,  $df=18$ ,  $p=0.1589$ ; DP-Control vs. DP-cKO:  $n=9-12$  animals per genotype, unpaired two-way t-test  $t=1.862$ ,  $df=19$ ,  $p=0.0781$ ).

F. 2-m/o IP-cKOs did not differ from IP-Controls on time spent in OFT margins ( $n=10$  mice/genotype, unpaired two-way t-test  $t=0.6912$ ,  $df=18$ ,  $p=0.4983$ ), whereas 2-m/o DP-cKOs spent more time in the OFT margins compared to DP-Controls ( $n=9-12$  mice/genotype, unpaired two-way t-test  $t=2.094$ ,  $df=19$ ,  $p=0.0499$ ).

**Figure S4 (Related to Figure 4) Burrus *et al.***

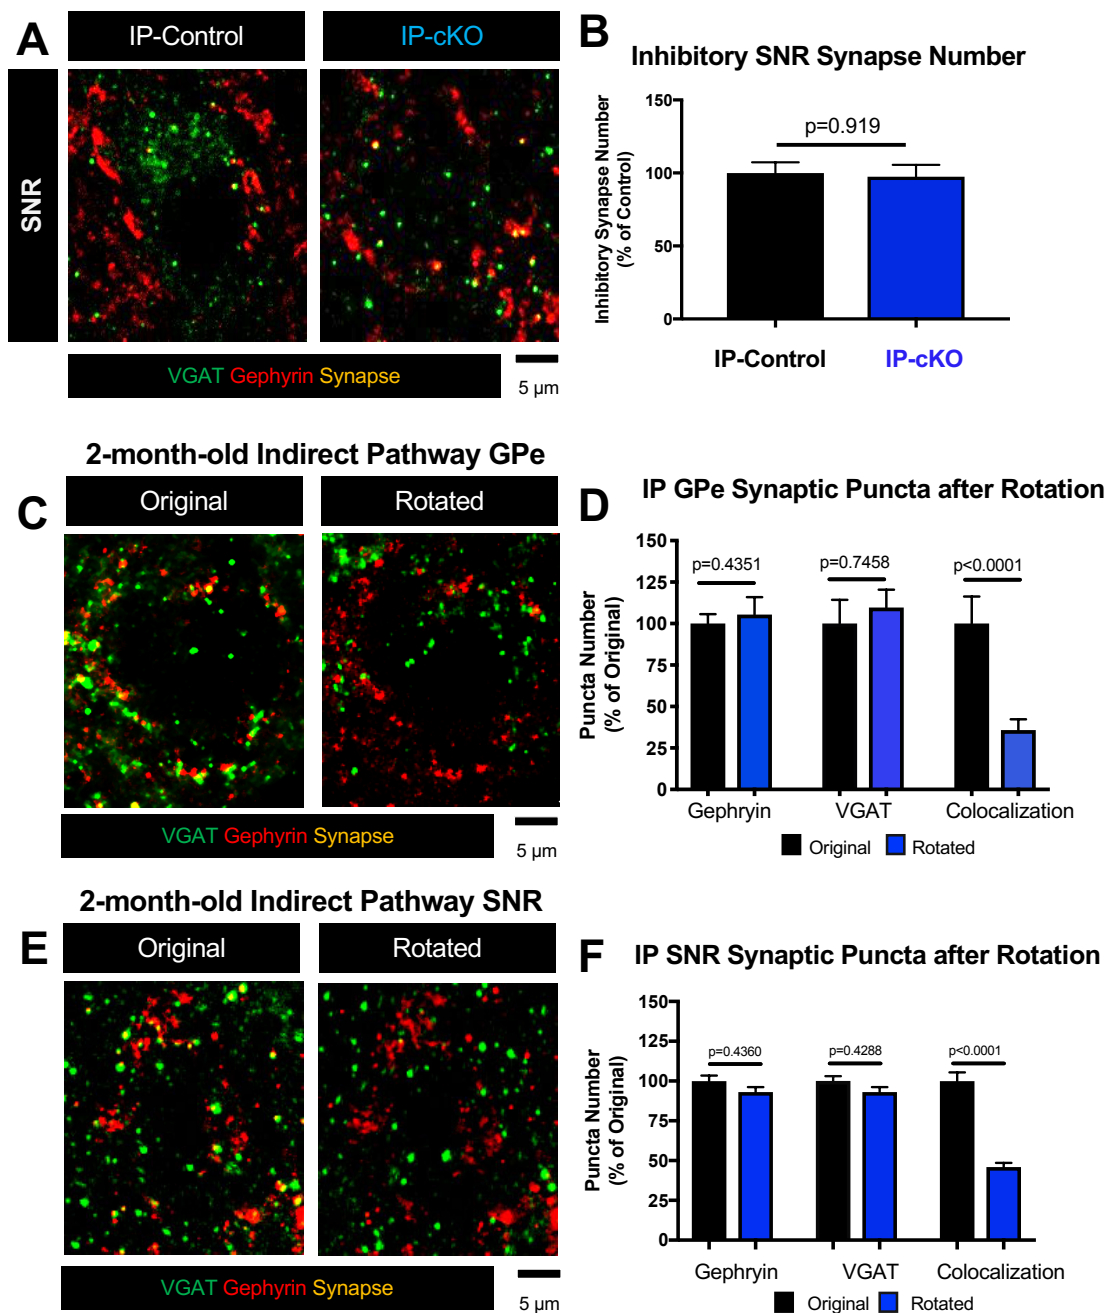

**Figure S4: Inhibitory synapse number in the SNR is unchanged by IP-cKO, and colocalization of VGAT and gephyrin puncta in GPe is not random (Related to Figure 4).**

- A. Representative images of inhibitory synapses in the SNR of 2-m/o IP-Controls and IP-cKOs, stained for VGAT (green) and gephyrin (red).
- B. Inhibitory synapse numbers are not changed in the SNR of 2-m/o IP-cKO mice compared to controls (n=3 replicates/mouse, 2 mice/genotype, Nested ANOVA by genotype  $F(1,11)=0.01$ ,  $p=0.919$ ).
- C. Representative images of original and gephyrin-rotated images from 2-m/o IP-Control GPe. Puncta location was randomized by rotating gephyrin channel  $90^\circ$  relative to VGAT channel.
- D. While gephyrin or VGAT puncta number do not differ, there is a significant reduction in the number of colocalized puncta in the rotated images compared to the originals (n = 3 replicates/mouse, 15 images/mouse, unpaired two-way t-tests, p-values displayed on graph).
- E. Representative images of original and gephyrin-rotated 2-m/o IP-Control SNR images. Puncta location was randomized by rotating gephyrin channel  $90^\circ$  relative to VGAT channel.
- F. Quantification of SNR rotated puncta number and colocalized synapses normalized to original images. The number of colocalized puncta is significantly reduced in the rotated images compared to the originals (original vs. rotated: n=3 replicates/mouse, 3 mice/condition, unpaired two-way t-test, p-values displayed on graph).

## Figure S5 (Related to Figure 5)

Burrus *et al.*

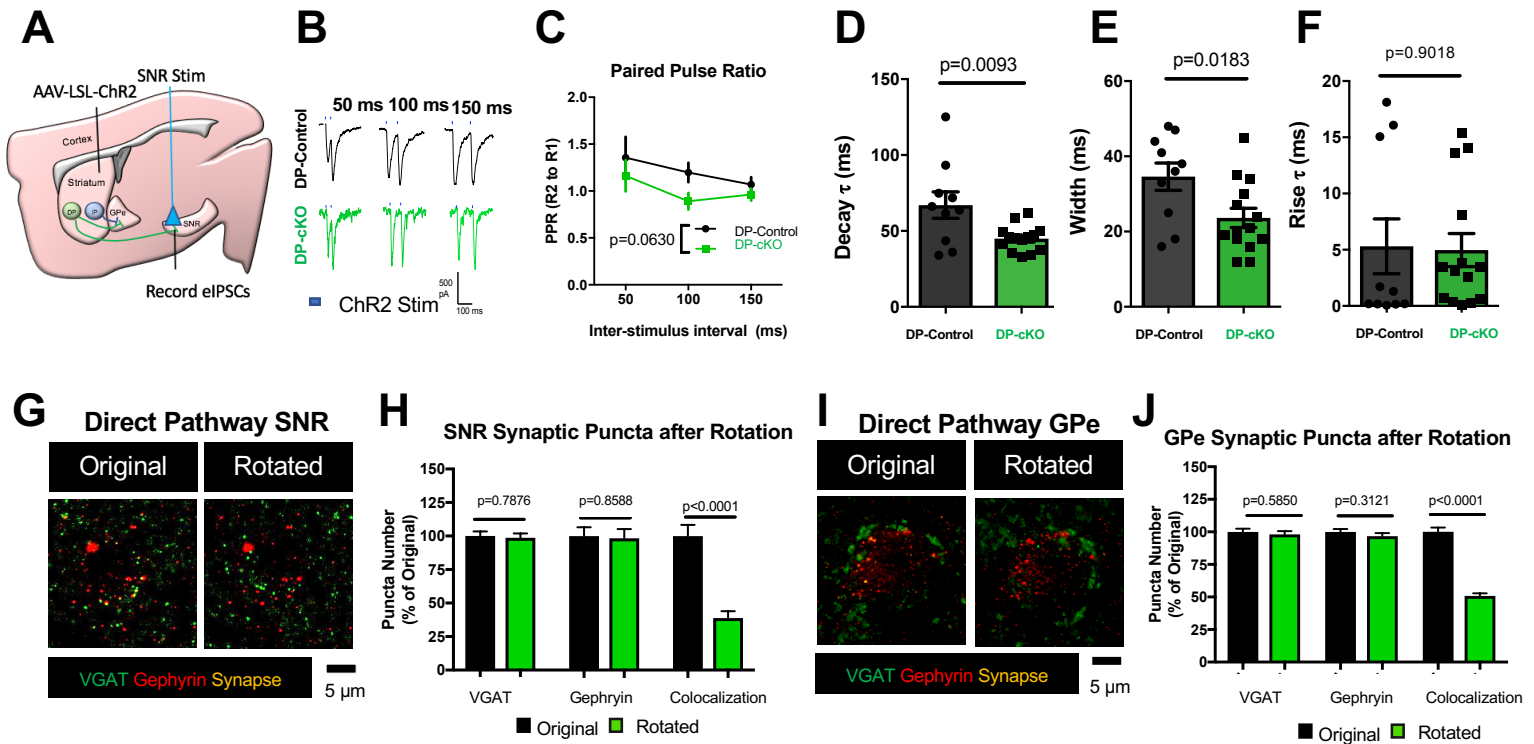

**Figure S5: DP-cKO alters the kinetics of synaptic transmission in the SNR (Related to Figure 5).**

A. Diagram of optogenetics experiment strategy. AAV-LoxStopLox-ChR2 virus was injected into the dorsal striatum of 2-m/o DP mice. After 3 weeks, sagittal acute sections containing the SNR were prepared and blue light bursts were applied to activate SNR terminals. eIPSCs were recorded from SNR neurons.

B. Representative traces of SNR eIPSCs produced in response to blue light stimulation.

C. Quantification of paired pulse ratio of SNR eIPSCs in response to blue light at 50 ms, 100 ms, or 150 ms intervals (two-way ANOVA, genotype effect  $F(1,66)=3.577$ ,  $p=0.0630$ , Graph represents mean  $\pm$  SEM).

D. Quantification of decay time (ms) of SNR eIPSCs ( $n=10-14$  cells per genotype, unpaired two-way t-test,  $p=0.0093$ ,  $t=2.850$ ,  $df=22$ , Bar graph displays mean  $\pm$  SEM, individual data points are overlaid).

E. Quantification of SNR eIPSC width (ms) ( $n=10-14$  cells per genotype, unpaired two-way t-test,  $p=0.0183$ ,  $t=2.549$ ,  $df=22$ , Bar graph displays mean  $\pm$  SEM, individual data points are overlaid).

F. Quantification of SNR eIPSC rise time (ms) ( $n=10-14$  cells per genotype, unpaired two-way t-test,  $p=0.9018$ ,  $t=0.1249$ ,  $df=22$ , Bar graph displays mean  $\pm$  SEM, individual data points are overlaid).

G. Representative images of original and gephyrin-rotated SNR images from the SNR of 2-m/o DP-Control mouse.

H. Quantification of SNR puncta number and colocalized puncta normalized to original images. Rotated images from DP-Control and DP-cKO SNR were analyzed (synapses original vs. rotated:  $n=1-2$  replicates/mouse, 3 mice/condition, unpaired two-way t-test,  $t=6.169$ ,  $df=56$ ,  $p<0.0001$ ).

I. Representative images of original and gephyrin-rotated GPe images from 2-m/o DP-Control mouse.

J. Quantification of GPe rotated puncta number and co-localized puncta normalized to original images. Rotated images from DP-Control and DP-cKO GPe were analyzed (synapses original vs. rotated:  $n=3$  replicates/animal, 3 animals/condition, unpaired two-way t-test,  $t=12.64$ ,  $df=178$ ,  $p<0.0001$ ).



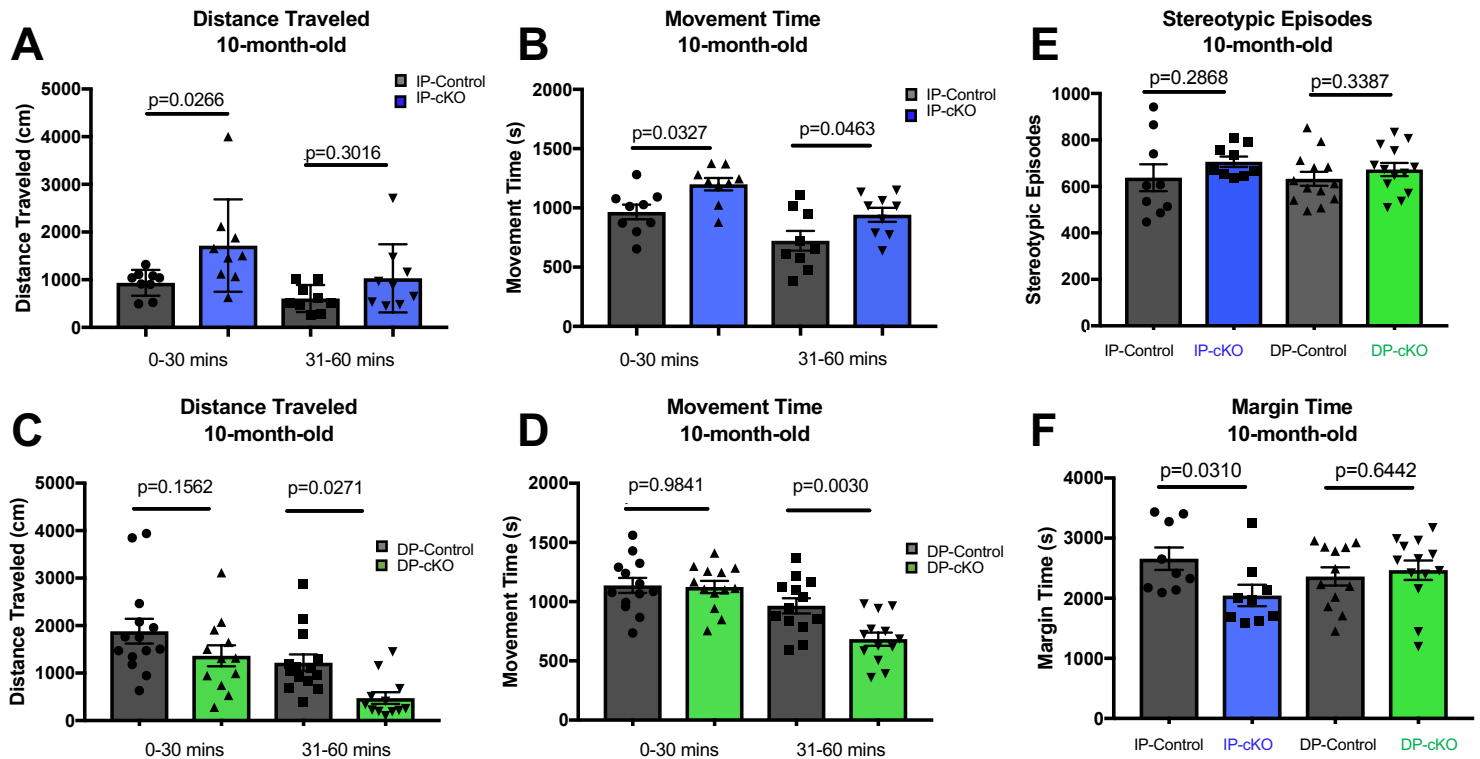

**Figure S6: Stereotypic episodes and margin time analysis of 10-m/o mice (Related to Figure 6).**

- A. 10-m/o IP-cKOs traveled significantly farther than IP-Controls during the first 30 minutes of the open field test, but not during the last 30 minutes of the test (one-way ANOVA  $F(3,32)=4.892$ ,  $p=0.0065$ , Sidak's multiple comparisons test p-values displayed on graph).
- B. 10-m/o IP-cKOs spent more time moving than IP-Controls during the first 30 minutes and last 30 minutes of the open field test, (one-way ANOVA  $F(3,32)=8.953$ ,  $p=0.0002$ , Sidak's multiple comparisons test p-values displayed on graph).
- C. 10-m/o DP-cKOs traveled a significantly shorter distance compared to DP-Controls only during the final 30 minutes of the open field test (one-way ANOVA  $F(3,48)=7.909$ ,  $p=0.0002$ , Sidak's multiple comparisons test p-values displayed on graph).
- D. 10-m/o DP-cKOs spent significantly less time moving compared to DP-Controls only during the final 30 minutes of the open field test (one-way ANOVA  $F(3,32)=12.76$ ,  $p<0.0001$ , Sidak's multiple comparisons test p-values displayed on graph).
- E. 10-m/o IP-cKO and DP-cKO mice did not differ from their relevant controls on OFT stereotypic episodes (IP-Control vs IP-cKO:  $n=9$  mice/genotype, unpaired two-way t-test  $t=1.102$ ,  $df=16$ ,  $p=0.2868$ ; DP-Control vs. DP-cKO:  $n=13$  mice/genotype, unpaired two-way t-test  $t=0.9763$ ,  $df=24$ ,  $p=0.3387$ ).
- F. 10-m/o IP-cKOs, but not DP-cKOs, spent less time in the OFT margins compared to relevant controls ( $n=9$  mice/genotype, unpaired two-way t-test  $t=2.366$ ,  $df=16$ ,  $p=0.0310$ ; DP-Control vs. DP-cKO:  $n=12-13$  mice/genotype, unpaired two-way t-test  $t=0.4680$ ,  $df=23$ ,  $p=0.6442$ ).

# Figure S7 (Related to Figure 7)

Burrus *et al.*

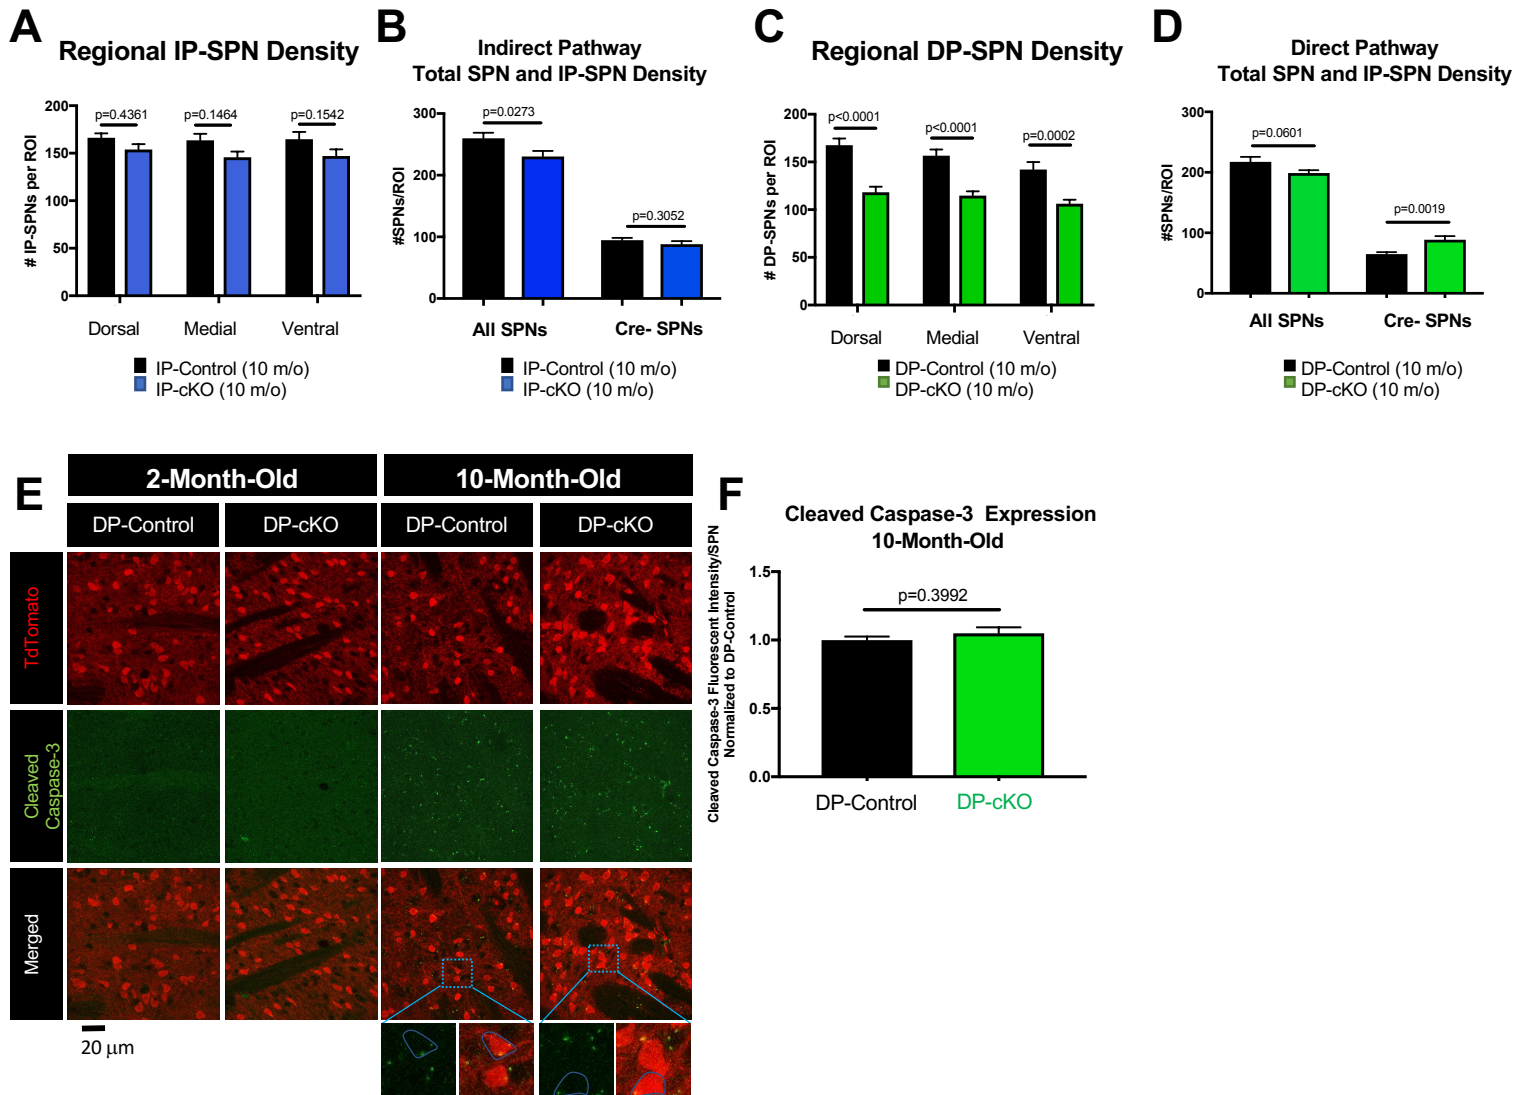

**Figure S7: Htt cKO does not enhance apoptosis but does lead to reactive gliosis (Related to Figure 7).**

A. There is no effect of region on IP-SPN density in 10-m/o IP-cKOs versus IP-Controls (n=6 images/animal, 3 animals/genotype, two-way ANOVA genotype x region interaction  $F(2,102)=0.1160$ ,  $p=0.8906$ , Sidak's multiple comparisons test used to compare within region, p-values displayed above).

B. The total density of SPNs (DARPP-32+ cells) in IP-cKOs is reduced compared to controls (n=2 mice/genotype, 6 images/mouse, unpaired two-way t-test  $t=2.307$ ,  $df=34$ ,  $p=0.0273$ ), but there is no difference in the density of Cre-/DARPP-32+ SPNs (n=2 mice/genotype, 6 images/mouse, unpaired two-way t-test  $t=1.041$ ,  $df=34$ ,  $p=0.3052$ ).

C. There is no effect of region on DP-SPN density in 10-m/o DP-cKOs versus DP-Controls, although there is a significant reduction in DP-SPN density within each region (n=6 images/mouse, 3 mice/genotype, two-way ANOVA genotype x region interaction  $F(2,102)=0.5959$ ,  $p=0.5530$ , Sidak's multiple comparisons test used to compare within region, p-values displayed above).

D. There is a trending reduction in the total density of SPNs (DARPP-32+ cells) in DP-cKOs compared to controls (n=2 mice/genotype, 6 images per mouse, unpaired two-way t-test  $t=1.945$ ,  $df=34$ ,  $p=0.0601$ ), along with an increase in the density of Cre-/DARPP-32+ SPNs (n=2 mice/genotype, 6 image/mouse, unpaired two-way t-test  $t=3.371$ ,  $df=34$ ,  $p=0.0019$ ).

E. Representative images of 2-m/o and 10-m/o DP-Control and DP-cKO dorsal striatum stained for TdTomato (red, DP-SPNs) and cleaved caspase-3 (green). Insets are provided to demonstrate the presence of cleaved caspase-3 puncta within 10-m/o DP-SPNs of both genotypes.

F. There is no difference in the expression of cleaved caspase-3 (integrated density/SPN area) within DP-SPNs of 10-m/o DP-cKO mice compared to controls (n= 2-3 mice/genotype, 6 images/mouse, unpaired two-way t-test  $t=0.8561$ ,  $df=28$ ,  $p=0.3992$ ).
